# Supplementary material for: One-pot synthesis of β-O-4 lignin modelsviathe insertion of stable 2-diazo-1,3-dicarbonyls into O–H bonds
Source: Royal Society of Chemistry journal article supplement (doi:10.1039/d0ob00800a), 2020-01-01

## One-pot synthesis of $\beta$ -O-4 lignin models via the insertion of stable 2-diazo-1,3-dicarbonyls into O-H bonds

Rafael Mafra P. Dias, Gabriela Pilli, Antonio C. B. Burtoloso

### Spectra data

#### Summary

|                                                                                                                                        |    |
|----------------------------------------------------------------------------------------------------------------------------------------|----|
| <sup>1</sup> H NMR (500 MHz, CDCl <sub>3</sub> ) methyl 3-oxo-3-phenylpropanoate <b>1a</b> .....                                       | 3  |
| <sup>13</sup> C NMR (126 MHz, CDCl <sub>3</sub> ) methyl 3-oxo-3-phenylpropanoate <b>1a</b> .....                                      | 3  |
| <sup>1</sup> H NMR (500 MHz, CDCl <sub>3</sub> ) methyl 3-(4-(benzyloxy)phenyl)-3-oxopropanoate <b>1b</b> .....                        | 4  |
| <sup>13</sup> C NMR (126 MHz, CDCl <sub>3</sub> ) methyl 3-(4-(benzyloxy)phenyl)-3-oxopropanoate <b>1b</b> .....                       | 4  |
| <sup>1</sup> H NMR (500 MHz, CDCl <sub>3</sub> ) methyl 3-(4-(benzyloxy)-3-methoxyphenyl)-3-oxopropanoate <b>1c</b> .....              | 5  |
| <sup>13</sup> C NMR (126 MHz, CDCl <sub>3</sub> ) methyl 3-(4-(benzyloxy)-3-methoxyphenyl)-3-oxopropanoate <b>1c</b> .....             | 5  |
| <sup>1</sup> H NMR (500 MHz, CDCl <sub>3</sub> ) methyl 3-(4-(benzyloxy)-3,5-dimethoxyphenyl)-3-oxopropanoate <b>1d</b> .....          | 6  |
| <sup>13</sup> C NMR (126 MHz, CDCl <sub>3</sub> ) methyl 3-(4-(benzyloxy)-3,5-dimethoxyphenyl)-3-oxopropanoate <b>1d</b> .....         | 6  |
| <sup>1</sup> H NMR (500 MHz, CDCl <sub>3</sub> ) methyl 2-diazo-3-oxo-3-phenylpropanoate <b>2a</b> .....                               | 7  |
| <sup>13</sup> C NMR (126 MHz, CDCl <sub>3</sub> ) methyl 2-diazo-3-oxo-3-phenylpropanoate <b>2a</b> .....                              | 7  |
| <sup>1</sup> H NMR (500 MHz, CDCl <sub>3</sub> ) methyl 3-(4-(benzyloxy)phenyl)-2-diazo-3-oxopropanoate <b>2b</b> .                    | 8  |
| <sup>13</sup> C NMR (126 MHz, CDCl <sub>3</sub> ) methyl 3-(4-(benzyloxy)phenyl)-2-diazo-3-oxopropanoate <b>2b</b> 8                   |    |
| <sup>1</sup> H NMR (500 MHz, CDCl <sub>3</sub> ) methyl 3-(4-(benzyloxy)-3-methoxyphenyl)-2-diazo-3-oxopropanoate <b>2c</b> .....      | 9  |
| <sup>13</sup> C NMR (126 MHz, CDCl <sub>3</sub> ) methyl 3-(4-(benzyloxy)-3-methoxyphenyl)-2-diazo-3-oxopropanoate <b>2c</b> .....     | 9  |
| <sup>1</sup> H NMR (500 MHz, CDCl <sub>3</sub> ) methyl 3-(4-(benzyloxy)-3,5-dimethoxyphenyl)-2-diazo-3-oxopropanoate <b>2d</b> .....  | 10 |
| <sup>13</sup> C NMR (126 MHz, CDCl <sub>3</sub> ) methyl 3-(4-(benzyloxy)-3,5-dimethoxyphenyl)-2-diazo-3-oxopropanoate <b>2d</b> ..... | 10 |
| <sup>1</sup> H NMR (400 MHz, CDCl <sub>3</sub> ) methyl 3-oxo-2-phenoxy-3-phenylpropanoate <b>3</b> .....                              | 11 |
| <sup>13</sup> C NMR (101 MHz, CDCl <sub>3</sub> ) methyl 3-oxo-2-phenoxy-3-phenylpropanoate <b>3</b> .....                             | 11 |
| <sup>1</sup> H NMR (500 MHz, CDCl <sub>3</sub> ) 2-phenoxy-1-phenylpropane-1,3-diol <b>4a</b> .....                                    | 12 |
| <sup>13</sup> C NMR (126 MHz, CDCl <sub>3</sub> ) 2-phenoxy-1-phenylpropane-1,3-diol <b>4a</b> .....                                   | 12 |
| <sup>1</sup> H NMR (500 MHz, CDCl <sub>3</sub> ) 2-(4-methoxyphenoxy)-1-phenylpropane-1,3-diol <b>4b</b> .....                         | 13 |
| <sup>13</sup> C NMR (126 MHz, CDCl <sub>3</sub> ) 2-(4-methoxyphenoxy)-1-phenylpropane-1,3-diol <b>4b</b> .....                        | 13 |
| <sup>1</sup> H NMR (500 MHz, CDCl <sub>3</sub> ) 1-phenyl-2-(4-propylphenoxy)propane-1,3-diol <b>4c</b> .....                          | 14 |
| <sup>13</sup> C NMR (126 MHz, CDCl <sub>3</sub> ) 1-phenyl-2-(4-propylphenoxy)propane-1,3-diol <b>4c</b> .....                         | 14 |
| <sup>1</sup> H NMR (500 MHz, CDCl <sub>3</sub> ) 2-(2-methoxyphenoxy)-1-phenylpropane-1,3-diol <b>4d</b> .....                         | 15 |
| <sup>13</sup> C NMR (126 MHz, CDCl <sub>3</sub> ) 2-(2-methoxyphenoxy)-1-phenylpropane-1,3-diol <b>4d</b> .....                        | 15 |

|                                                                                                                                                                                 |    |
|---------------------------------------------------------------------------------------------------------------------------------------------------------------------------------|----|
| <sup>1</sup> H NMR (500 MHz, CDCl <sub>3</sub> ) 2-(2-methoxy-4-methylphenoxy)-1-phenylpropane-1,3-diol <b>4e</b> ..                                                            | 16 |
| <sup>13</sup> C NMR (126 MHz, CDCl <sub>3</sub> ) 2-(2-methoxy-4-methylphenoxy)-1-phenylpropane-1,3-diol <b>4e</b> ..                                                           | 16 |
| <sup>1</sup> H NMR (500 MHz, CDCl <sub>3</sub> ) 2-(2,6-dimethoxyphenoxy)-1-phenylpropane-1,3-diol <b>4f</b> .....                                                              | 17 |
| <sup>13</sup> C NMR (126 MHz, CDCl <sub>3</sub> ) 2-(2,6-dimethoxyphenoxy)-1-phenylpropane-1,3-diol <b>4f</b> .....                                                             | 17 |
| <sup>1</sup> H NMR (500 MHz, CDCl <sub>3</sub> ) 1-(4-(benzyloxy)phenyl)-2-(2-methoxyphenoxy)propane-1,3-diol <b>4g</b> .....                                                   | 18 |
| <sup>13</sup> C NMR (126 MHz, CDCl <sub>3</sub> ) 1-(4-(benzyloxy)phenyl)-2-(2-methoxyphenoxy)propane-1,3-diol <b>4g</b> .....                                                  | 18 |
| <sup>1</sup> H NMR (500 MHz, CDCl <sub>3</sub> + few drops of D <sub>2</sub> O) 1-(4-(benzyloxy)-3-methoxyphenyl)-2-(2-methoxyphenoxy)propane-1,3-diol <b>4h</b> .....          | 19 |
| <sup>13</sup> C NMR (126 MHz, CDCl <sub>3</sub> ) 1-(4-(benzyloxy)-3-methoxyphenyl)-2-(2-methoxyphenoxy)propane-1,3-diol <b>4h</b> .....                                        | 19 |
| <sup>1</sup> H NMR (500 MHz, CDCl <sub>3</sub> ) 1-(4-(benzyloxy)-3,5-dimethoxyphenyl)-2-(2-methoxyphenoxy)propane-1,3-diol <b>4i</b> .....                                     | 20 |
| <sup>13</sup> C NMR (126 MHz, CDCl <sub>3</sub> ) 1-(4-(benzyloxy)-3,5-dimethoxyphenyl)-2-(2-methoxyphenoxy)propane-1,3-diol <b>4i</b> .....                                    | 20 |
| <sup>1</sup> H NMR (500 MHz, CDCl <sub>3</sub> ) 1-(4-(benzyloxy)-3,5-dimethoxyphenyl)-2-(2-methoxy-4-methylphenoxy)propane-1,3-diol <b>4j</b> .....                            | 21 |
| <sup>13</sup> C NMR (126 MHz, CDCl <sub>3</sub> ) 1-(4-(benzyloxy)-3,5-dimethoxyphenyl)-2-(2-methoxy-4-methylphenoxy)propane-1,3-diol <b>4j</b> .....                           | 21 |
| <sup>1</sup> H NMR (500 MHz, CDCl <sub>3</sub> ) 1-(4-hydroxyphenyl)-2-(2-methoxyphenoxy)propane-1,3-diol <b>4l</b> .....                                                       | 22 |
| <sup>13</sup> C NMR (126 MHz, CDCl <sub>3</sub> ) 1-(4-hydroxyphenyl)-2-(2-methoxyphenoxy)propane-1,3-diol <b>4l</b> .....                                                      | 22 |
| <sup>1</sup> H NMR (500 MHz, CDCl <sub>3</sub> + few drops of D <sub>2</sub> O) 1-(4-hydroxy-3-methoxyphenyl)-2-(2-methoxyphenoxy)propane-1,3-diol <b>4m</b> .....              | 23 |
| <sup>13</sup> C NMR (126 MHz, CDCl <sub>3</sub> ) 1-(4-hydroxy-3-methoxyphenyl)-2-(2-methoxyphenoxy)propane-1,3-diol <b>4m</b> .....                                            | 23 |
| <sup>1</sup> H NMR (500 MHz, CDCl <sub>3</sub> + few drops of D <sub>2</sub> O) 1-(4-hydroxy-3,5-dimethoxyphenyl)-2-(2-methoxyphenoxy)propane-1,3-diol <b>4n</b> .....          | 24 |
| <sup>13</sup> C NMR (126 MHz, CDCl <sub>3</sub> ) 1-(4-hydroxy-3,5-dimethoxyphenyl)-2-(2-methoxyphenoxy)propane-1,3-diol <b>4n</b> .....                                        | 24 |
| <sup>1</sup> H NMR (500 MHz, CDCl <sub>3</sub> + few drops of D <sub>2</sub> O) 1-(4-hydroxy-3,5-dimethoxyphenyl)-2-(2-methoxy-4-methylphenoxy)propane-1,3-diol <b>4o</b> ..... | 25 |
| <sup>13</sup> C NMR (126 MHz, CDCl <sub>3</sub> ) 1-(4-hydroxy-3,5-dimethoxyphenyl)-2-(2-methoxy-4-methylphenoxy)propane-1,3-diol <b>4o</b> .....                               | 25 |
| <sup>1</sup> H NMR and <sup>13</sup> C NMR of Insertion product with ethanol .....                                                                                              | 26 |

**<sup>1</sup>H NMR (500 MHz, CDCl<sub>3</sub>) methyl 3-oxo-3-phenylpropanoate 1a**

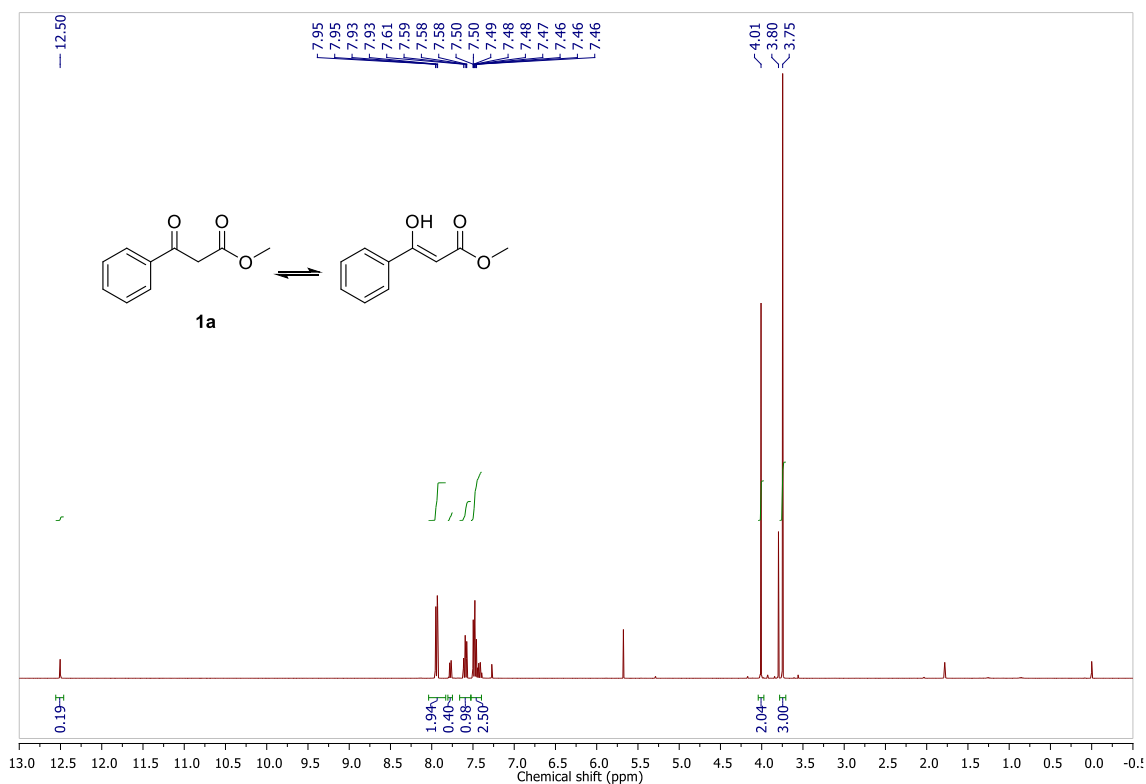

**<sup>13</sup>C NMR (126 MHz, CDCl<sub>3</sub>) methyl 3-oxo-3-phenylpropanoate 1a**

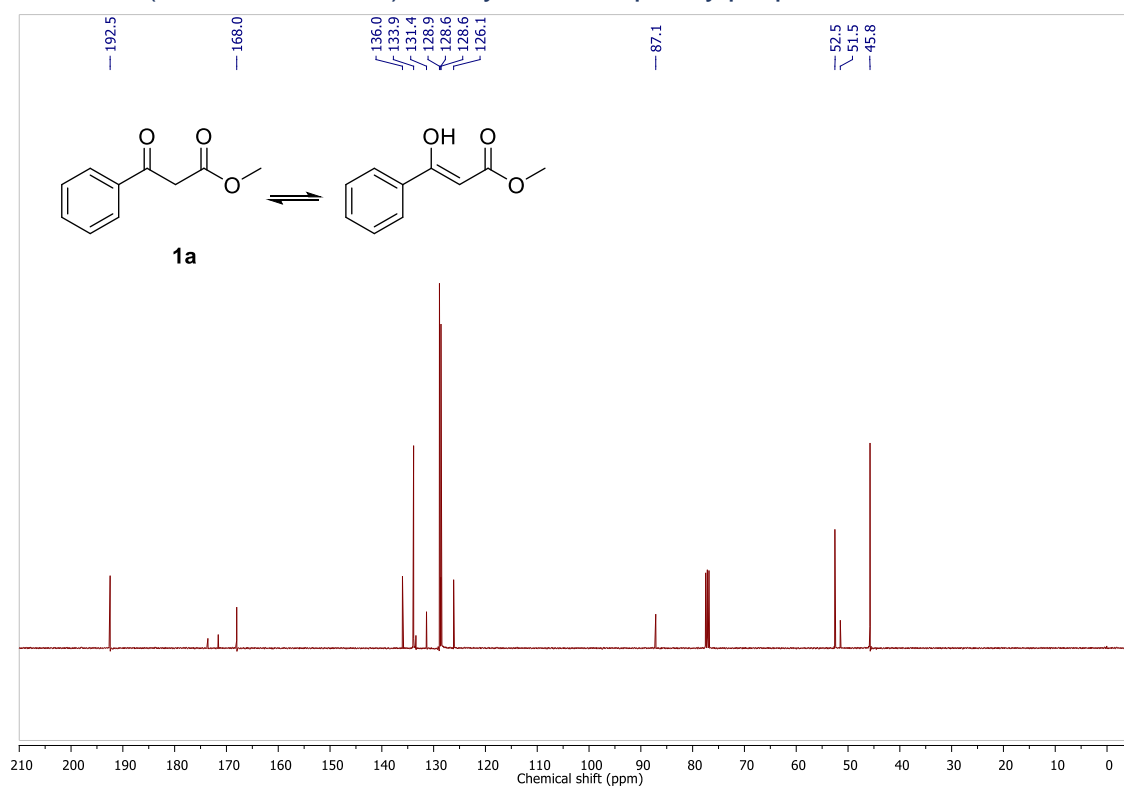

**<sup>1</sup>H NMR (500 MHz, CDCl<sub>3</sub>) methyl 3-(4-(benzyloxy)phenyl)-3-oxopropanoate **1b****

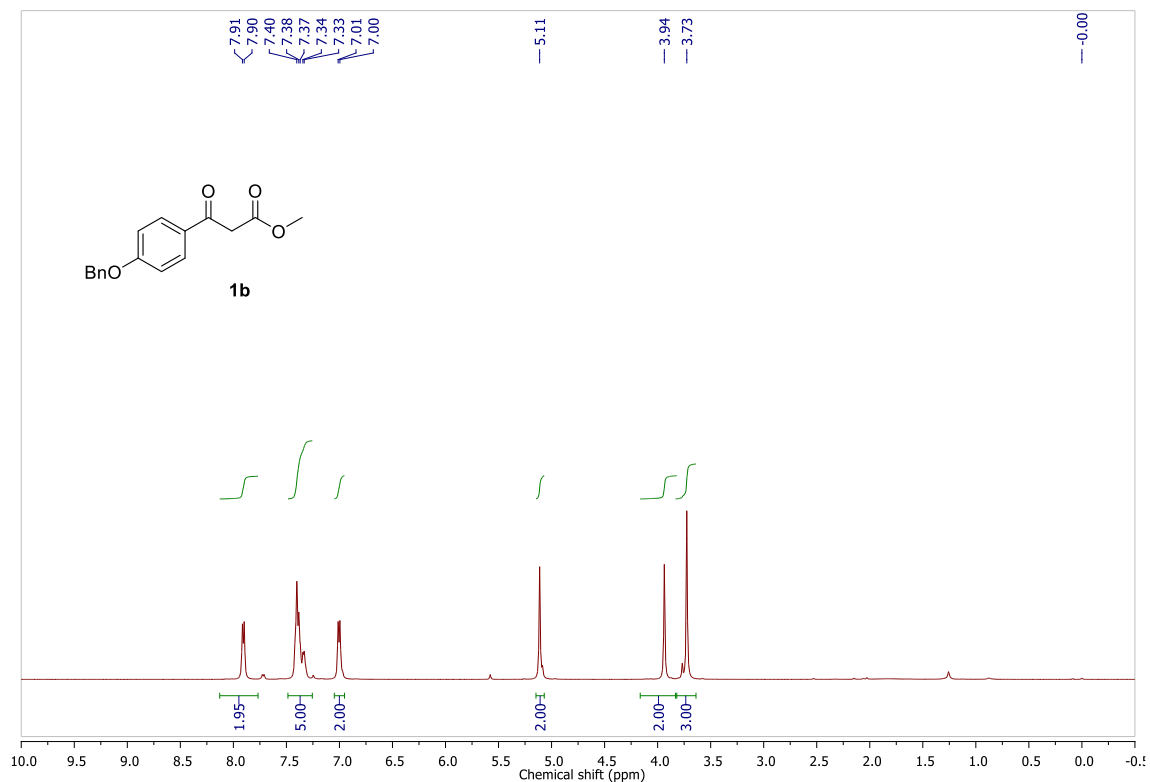

**<sup>13</sup>C NMR (126 MHz, CDCl<sub>3</sub>) methyl 3-(4-(benzyloxy)phenyl)-3-oxopropanoate **1b****

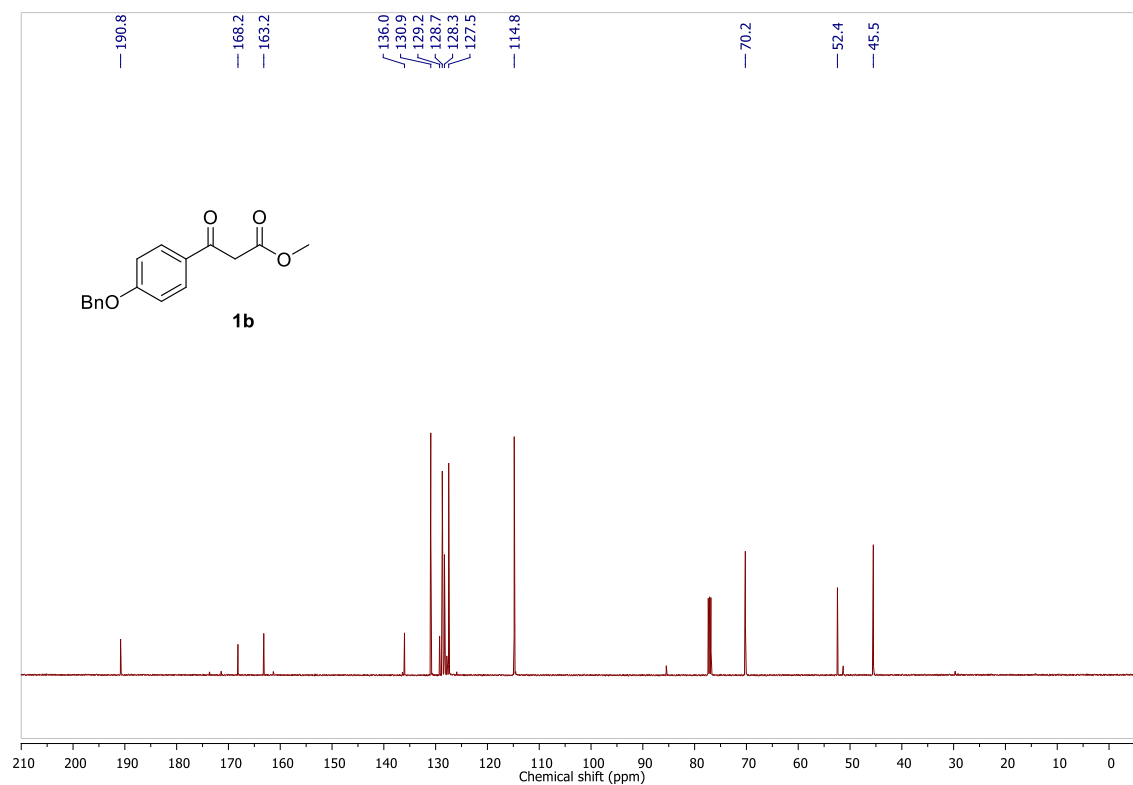

**<sup>1</sup>H NMR (500 MHz, CDCl<sub>3</sub>) methyl 3-(4-(benzyloxy)-3-methoxyphenyl)-3-oxopropanoate 1c**

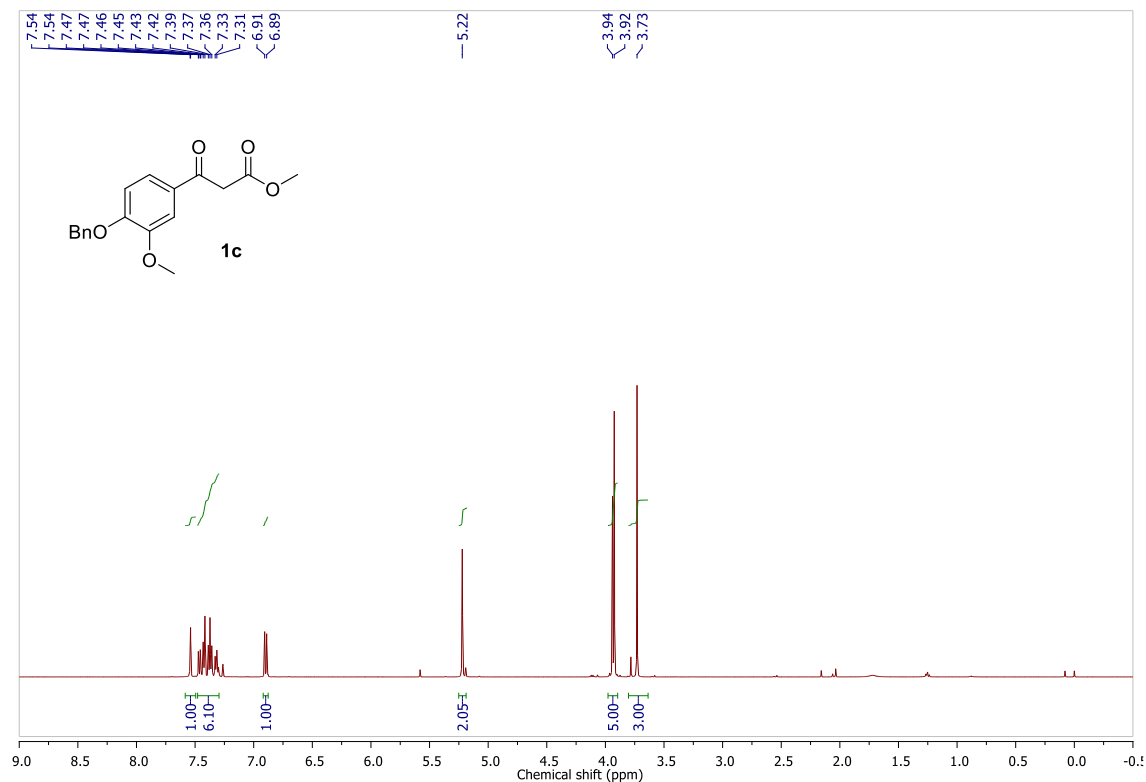

**<sup>13</sup>C NMR (126 MHz, CDCl<sub>3</sub>) methyl 3-(4-(benzyloxy)-3-methoxyphenyl)-3-oxopropanoate 1c**

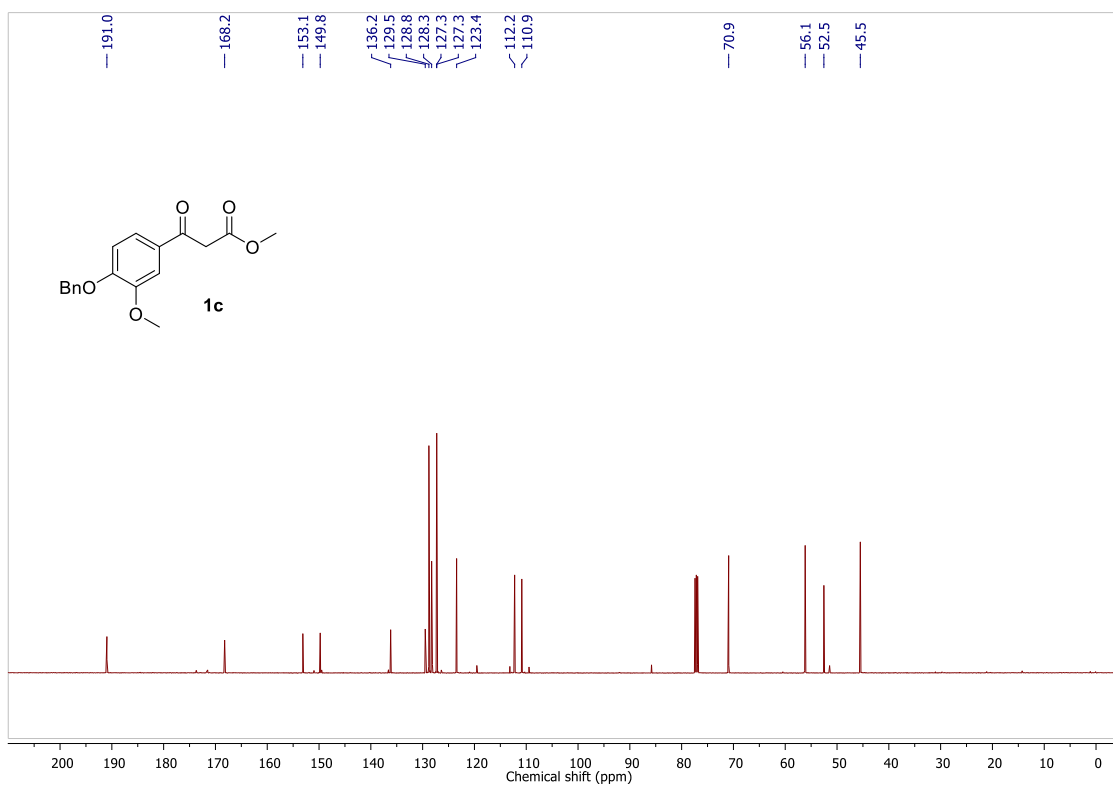

**<sup>1</sup>H NMR (500 MHz, CDCl<sub>3</sub>) methyl 3-(4-(benzyloxy)-3,5-dimethoxyphenyl)-3-oxopropanoate **1d****

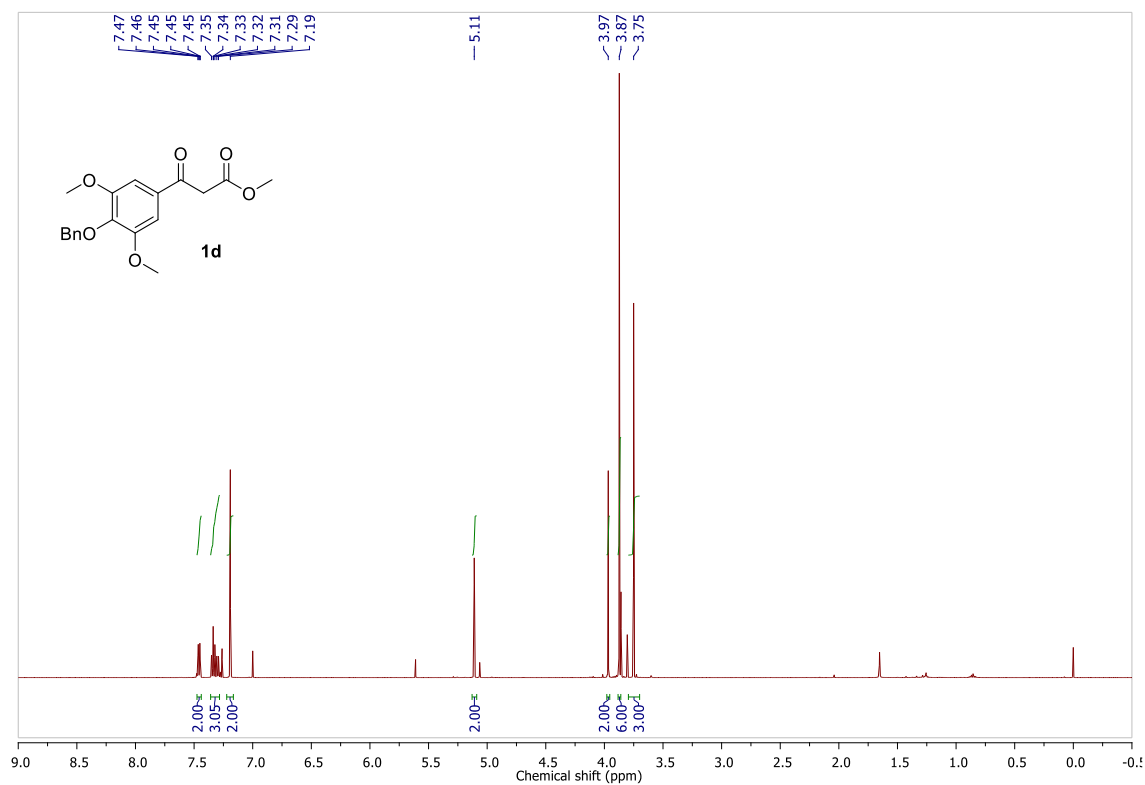

**<sup>13</sup>C NMR (126 MHz, CDCl<sub>3</sub>) methyl 3-(4-(benzyloxy)-3,5-dimethoxyphenyl)-3-oxopropanoate **1d****

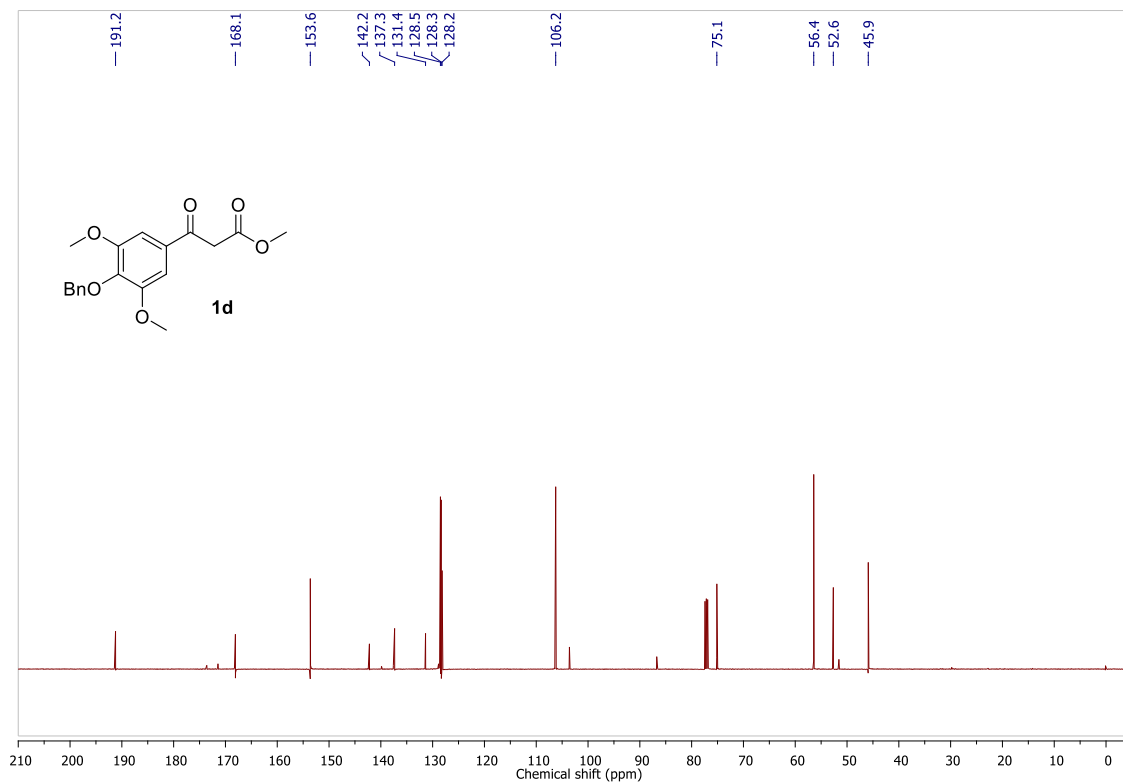

**<sup>1</sup>H NMR (500 MHz, CDCl<sub>3</sub>) methyl 2-diazo-3-oxo-3-phenylpropanoate **2a****

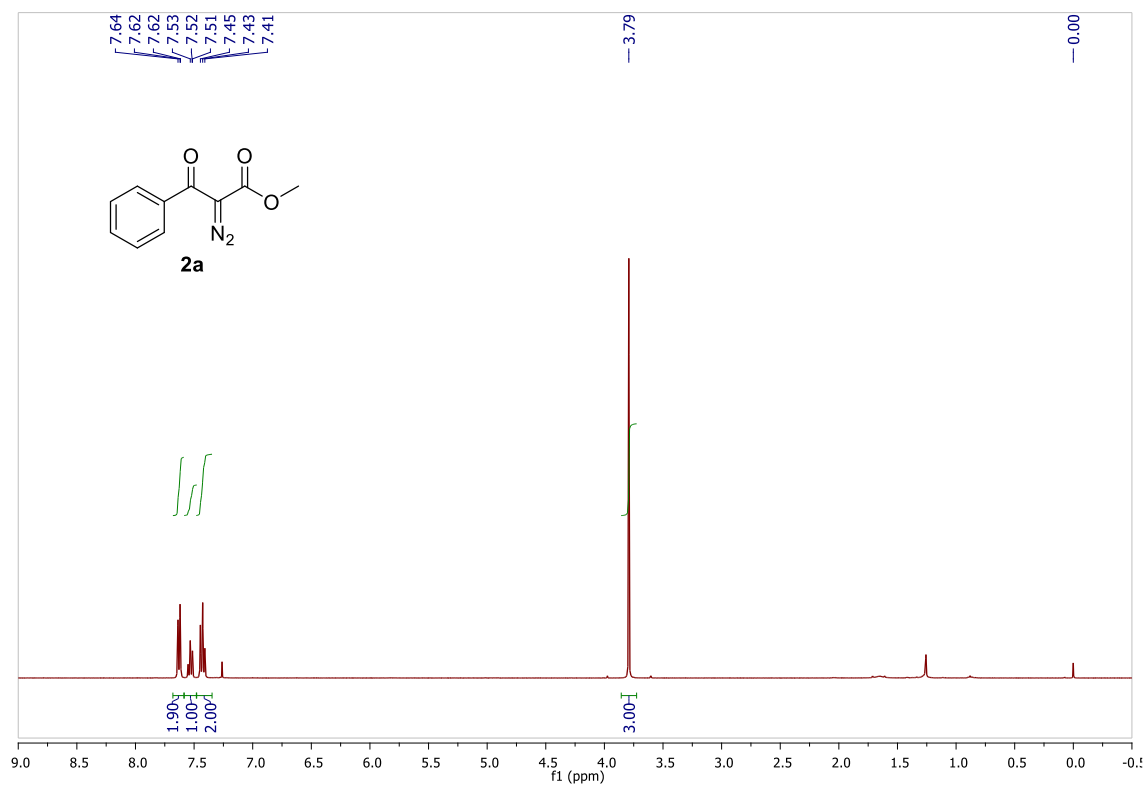

**<sup>13</sup>C NMR (126 MHz, CDCl<sub>3</sub>) methyl 2-diazo-3-oxo-3-phenylpropanoate **2a****

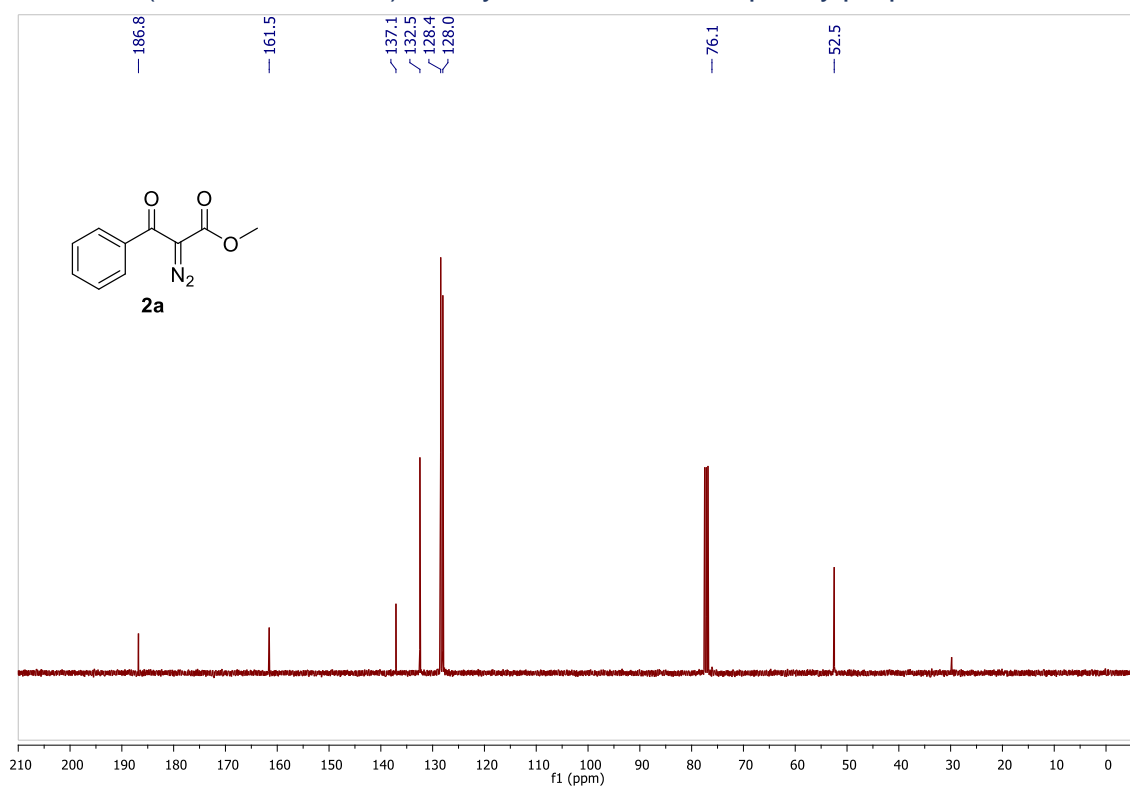

**<sup>1</sup>H NMR (500 MHz, CDCl<sub>3</sub>) methyl 3-(4-(benzyloxy)phenyl)-2-diazo-3-oxopropanoate **2b****

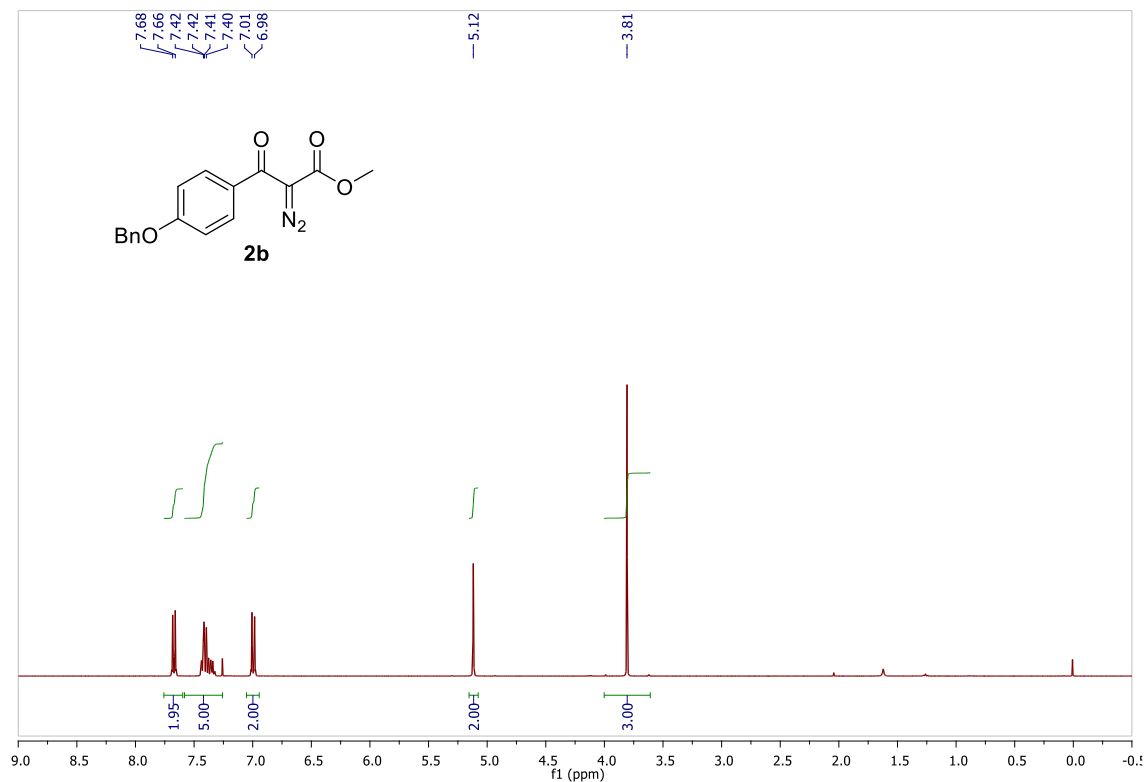

**<sup>13</sup>C NMR (126 MHz, CDCl<sub>3</sub>) methyl 3-(4-(benzyloxy)phenyl)-2-diazo-3-oxopropanoate **2b****

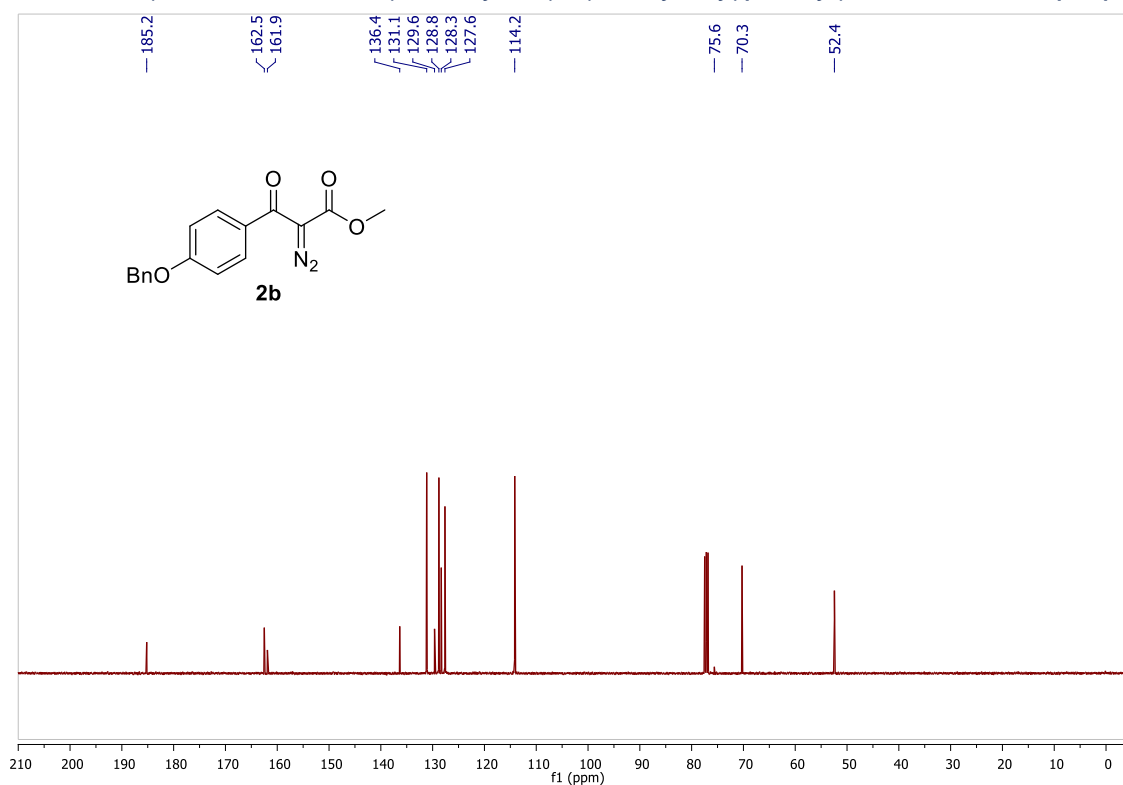



**<sup>1</sup>H NMR** (500 MHz, CDCl<sub>3</sub>) methyl 3-(4-(benzyloxy)-3-methoxyphenyl)-2-diazo-3-oxopropanoate **2c**

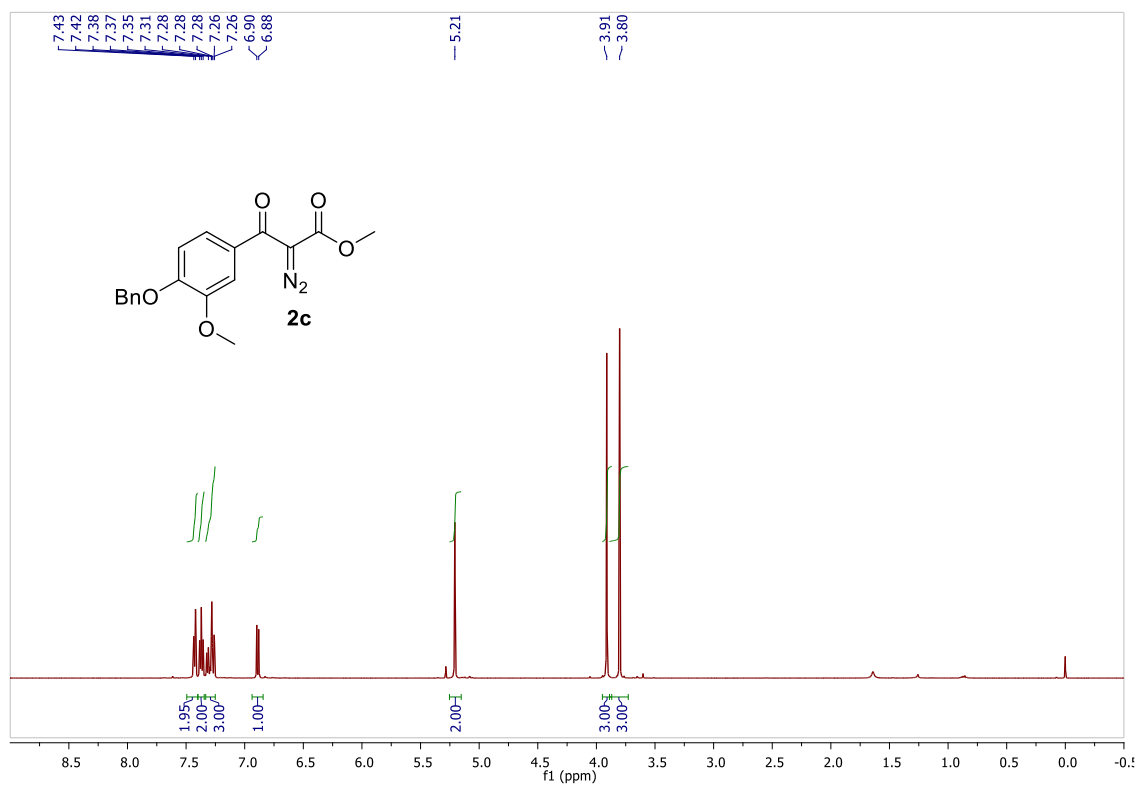

**<sup>13</sup>C NMR** (126 MHz, CDCl<sub>3</sub>) methyl 3-(4-(benzyloxy)-3-methoxyphenyl)-2-diazo-3-oxopropanoate **2c**

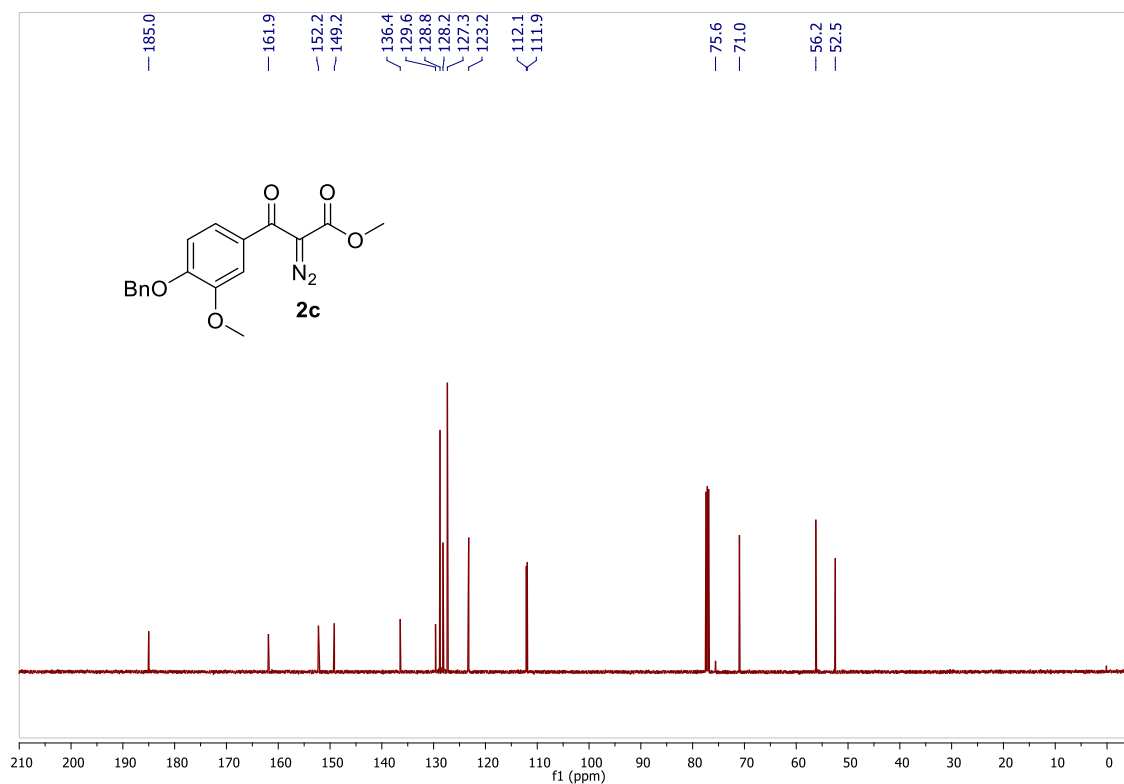

**<sup>1</sup>H NMR** (500 MHz, CDCl<sub>3</sub>) methyl 3-(4-(benzyloxy)-3,5-dimethoxyphenyl)-2-diazo-3-oxopropanoate **2d**

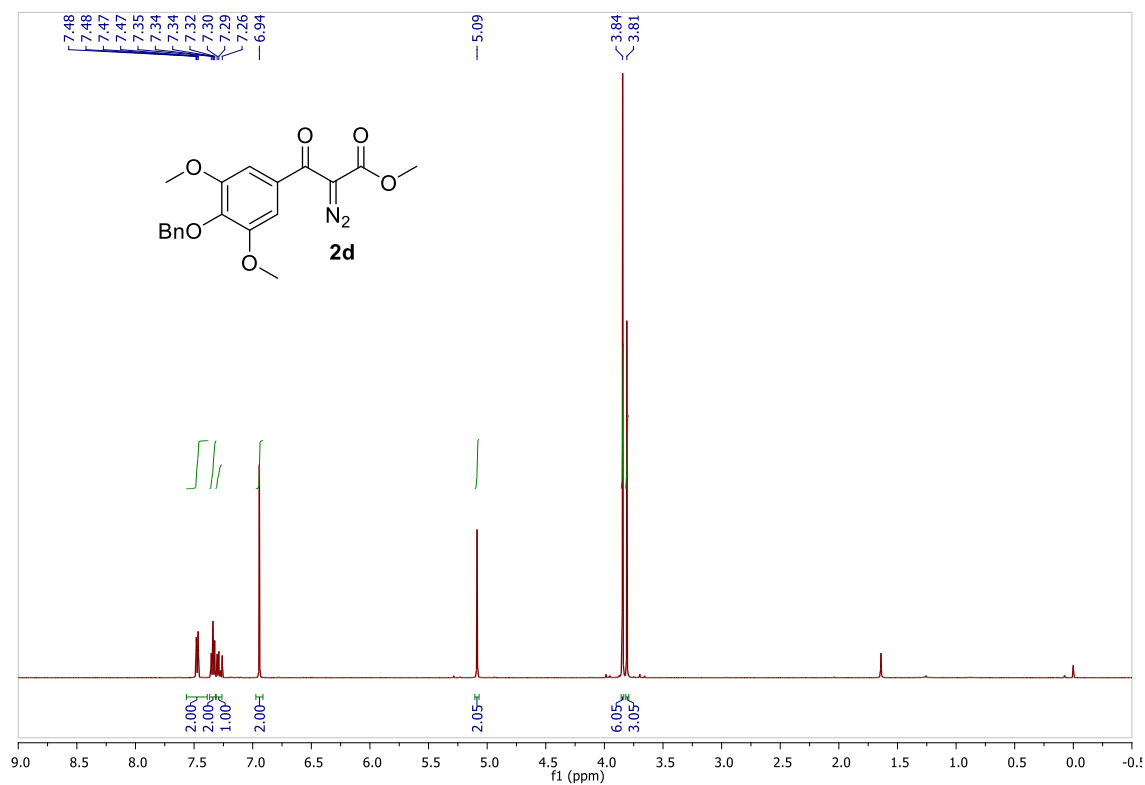

**<sup>13</sup>C NMR** (126 MHz, CDCl<sub>3</sub>) methyl 3-(4-(benzyloxy)-3,5-dimethoxyphenyl)-2-diazo-3-oxopropanoate **2d**

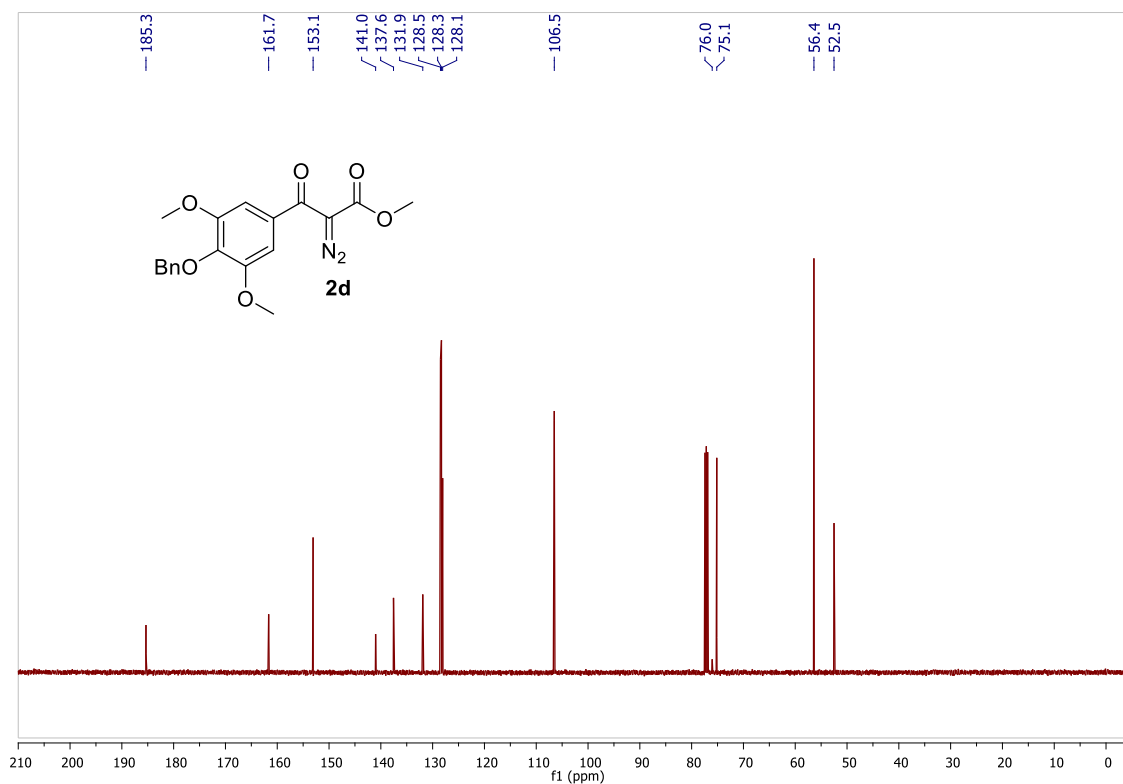

**<sup>1</sup>H NMR (400 MHz, CDCl<sub>3</sub>) methyl 3-oxo-2-phenoxy-3-phenylpropanoate **3****

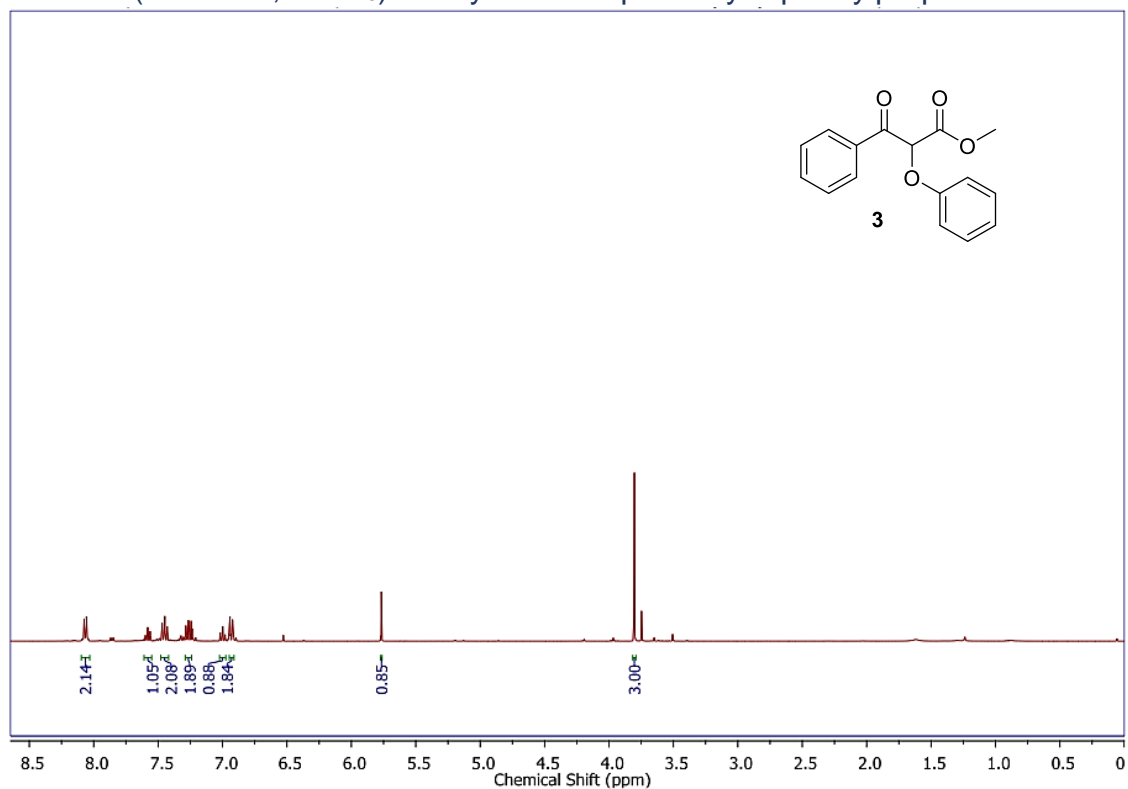

**<sup>13</sup>C NMR (101 MHz, CDCl<sub>3</sub>) methyl 3-oxo-2-phenoxy-3-phenylpropanoate **3****

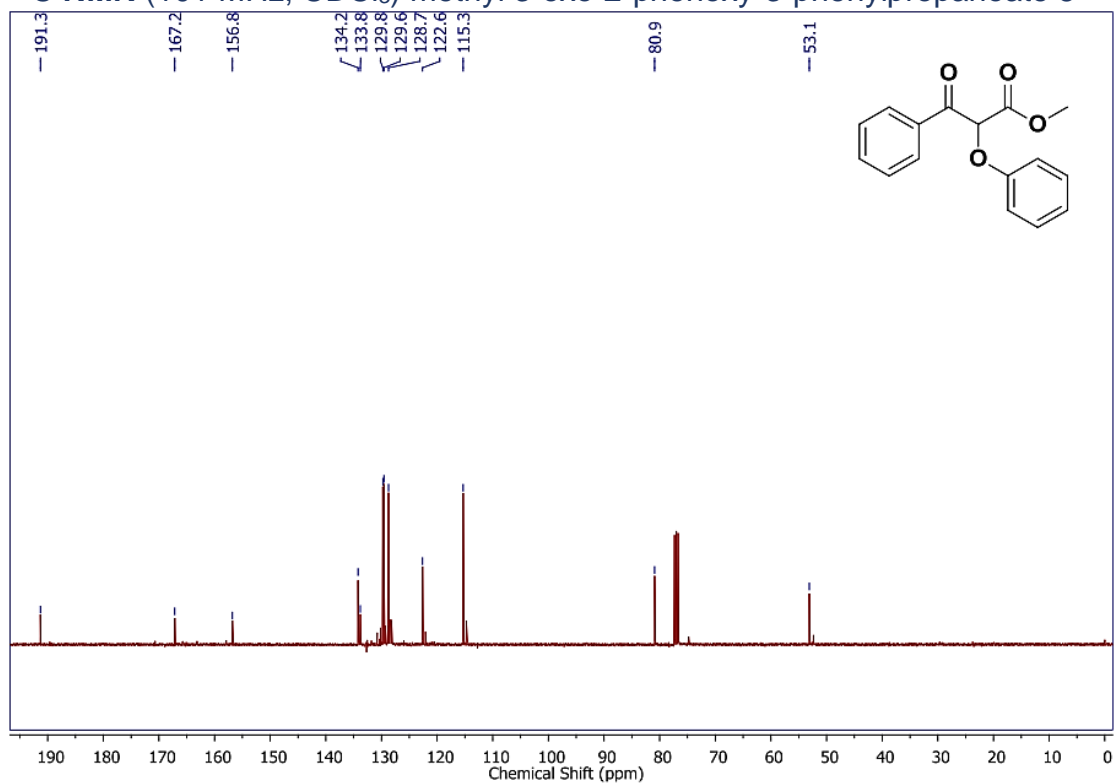

### <sup>1</sup>H NMR (500 MHz, CDCl<sub>3</sub>) 2-phenoxy-1-phenylpropane-1,3-diol **4a**

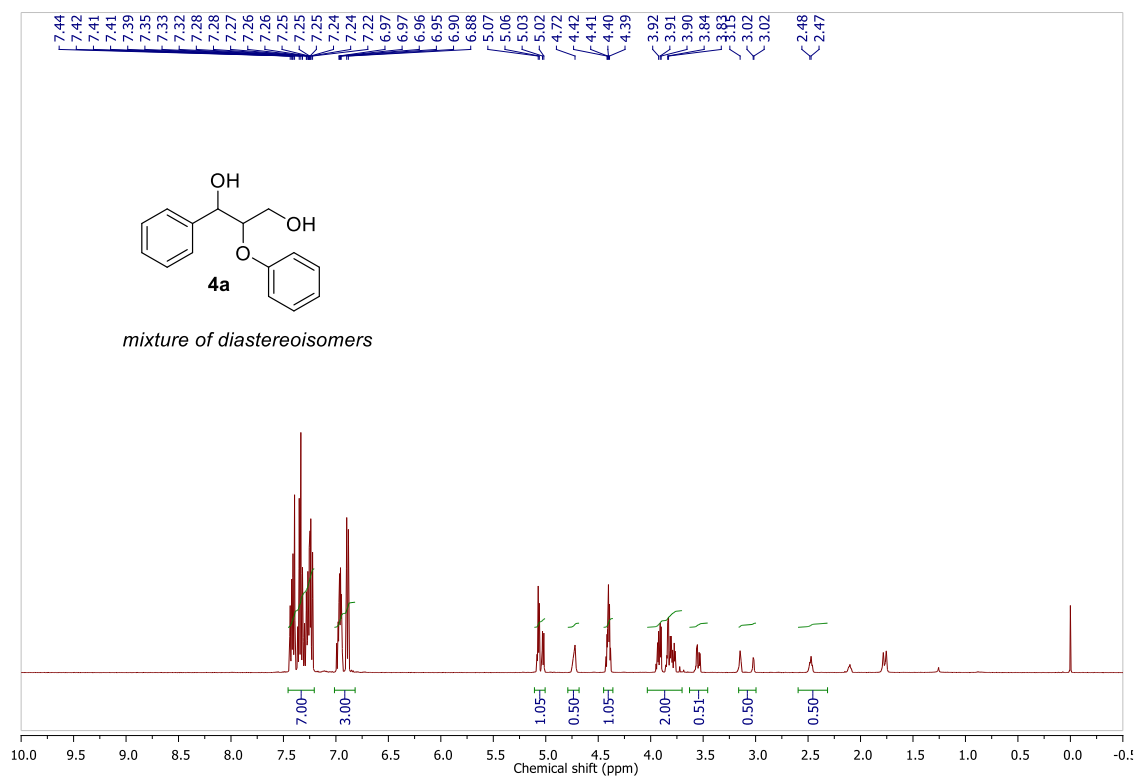

### <sup>13</sup>C NMR (126 MHz, CDCl<sub>3</sub>) 2-phenoxy-1-phenylpropane-1,3-diol **4a**

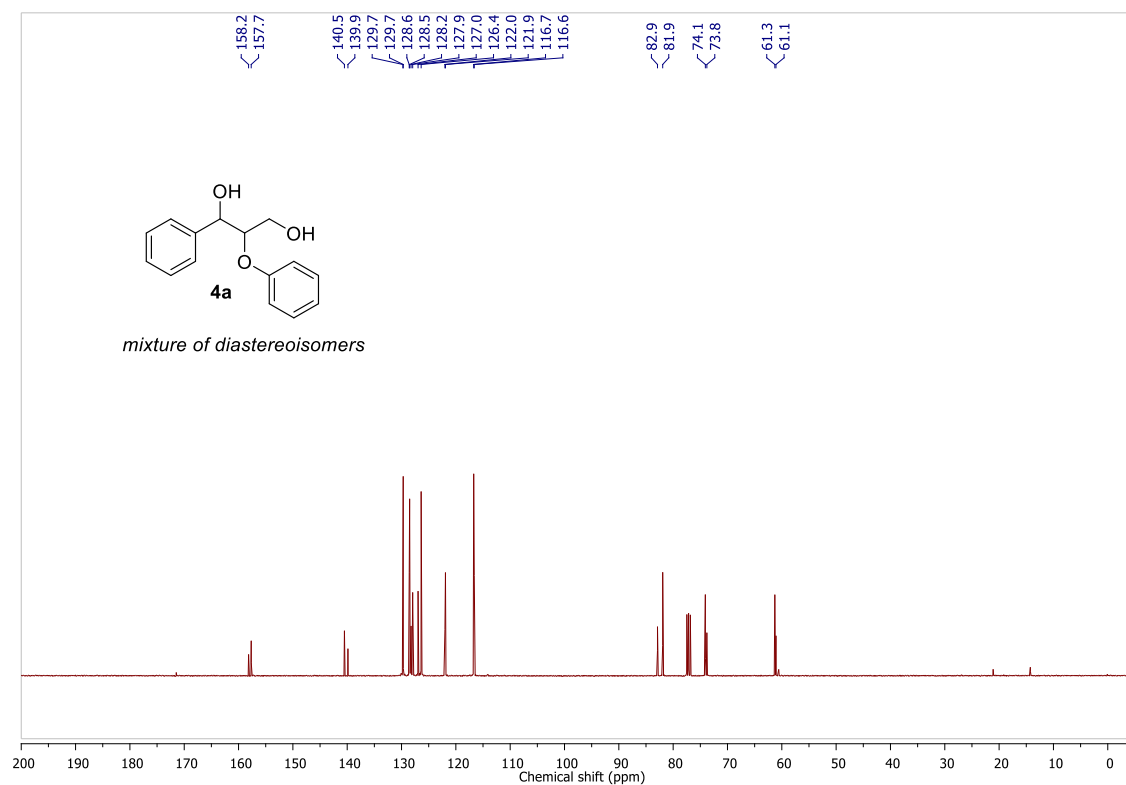

### <sup>1</sup>H NMR (500 MHz, CDCl<sub>3</sub>) 2-(4-methoxyphenoxy)-1-phenylpropane-1,3-diol **4b**

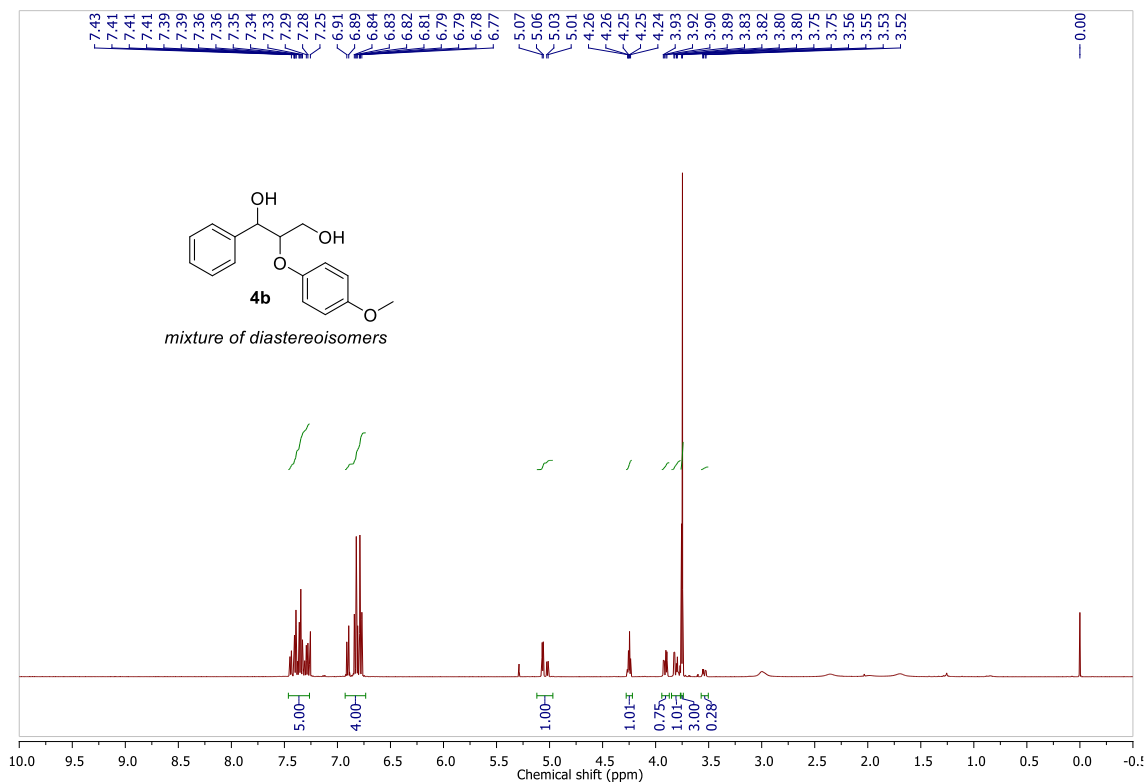

### <sup>13</sup>C NMR (126 MHz, CDCl<sub>3</sub>) 2-(4-methoxyphenoxy)-1-phenylpropane-1,3-diol **4b**

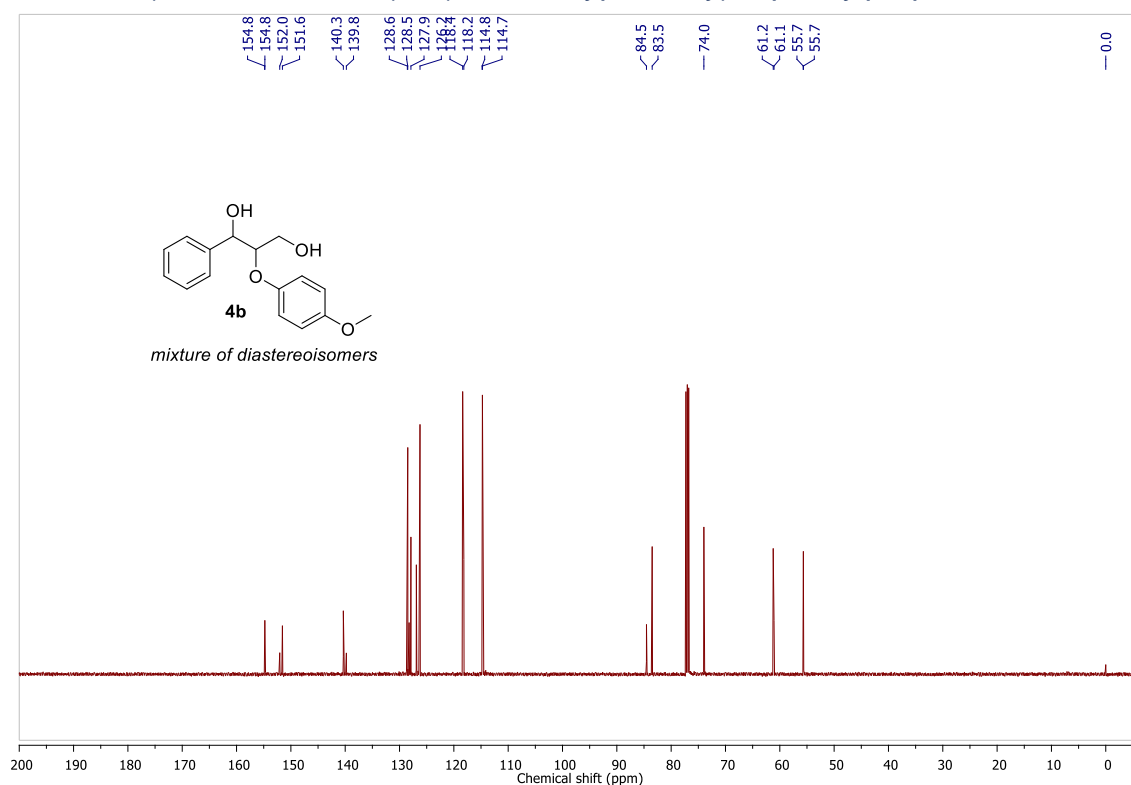

### <sup>1</sup>H NMR (500 MHz, CDCl<sub>3</sub>) 1-phenyl-2-(4-propylphenoxy)propane-1,3-diol **4c**

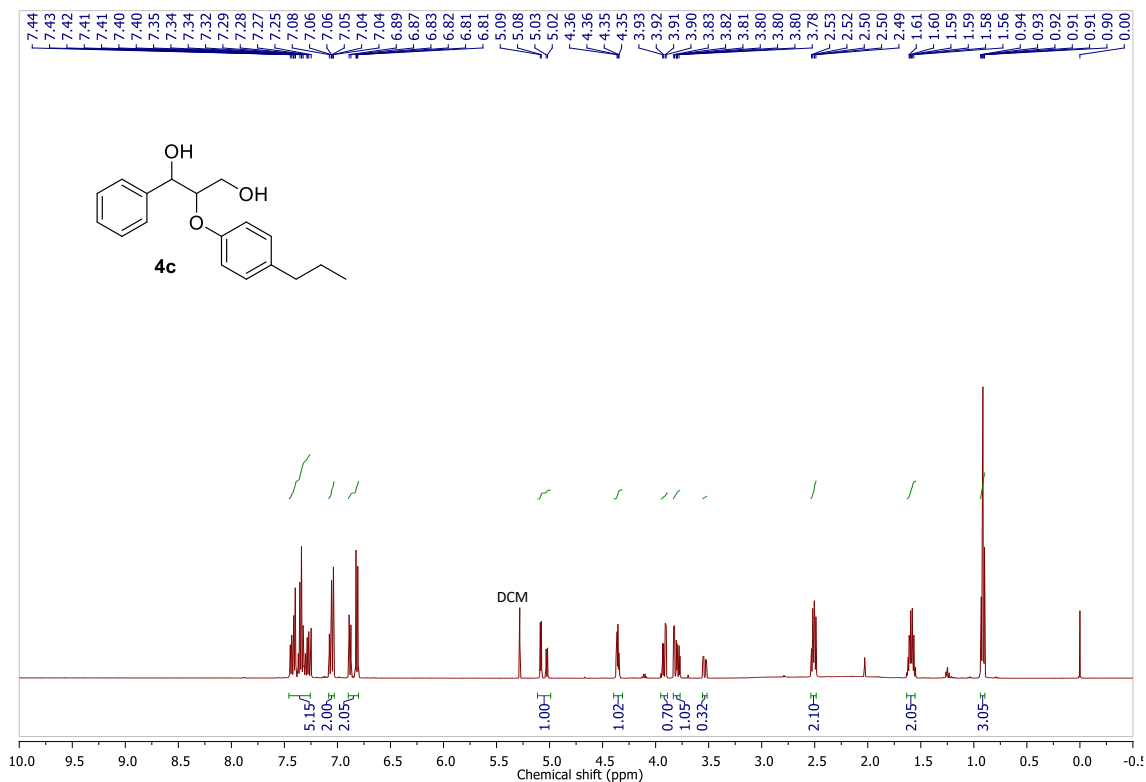

### <sup>13</sup>C NMR (126 MHz, CDCl<sub>3</sub>) 1-phenyl-2-(4-propylphenoxy)propane-1,3-diol **4c**

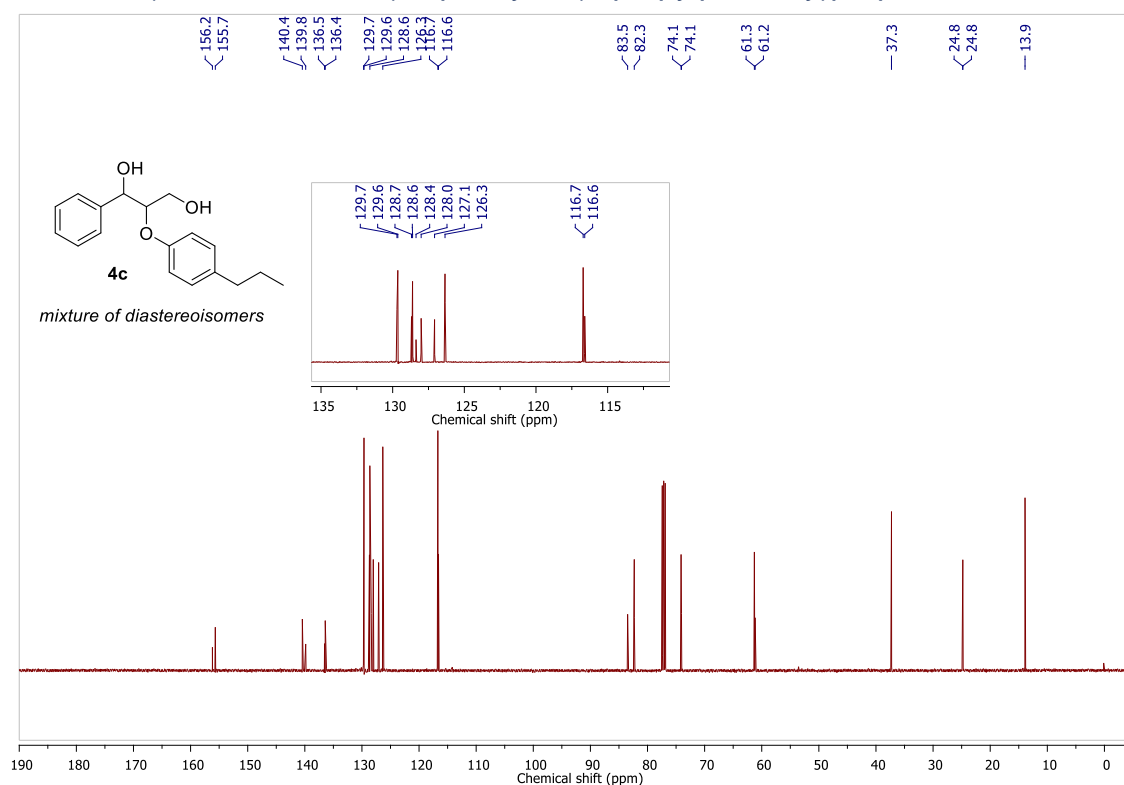

**<sup>1</sup>H NMR (500 MHz, CDCl<sub>3</sub>) 2-(2-methoxyphenoxy)-1-phenylpropane-1,3-diol **4d****

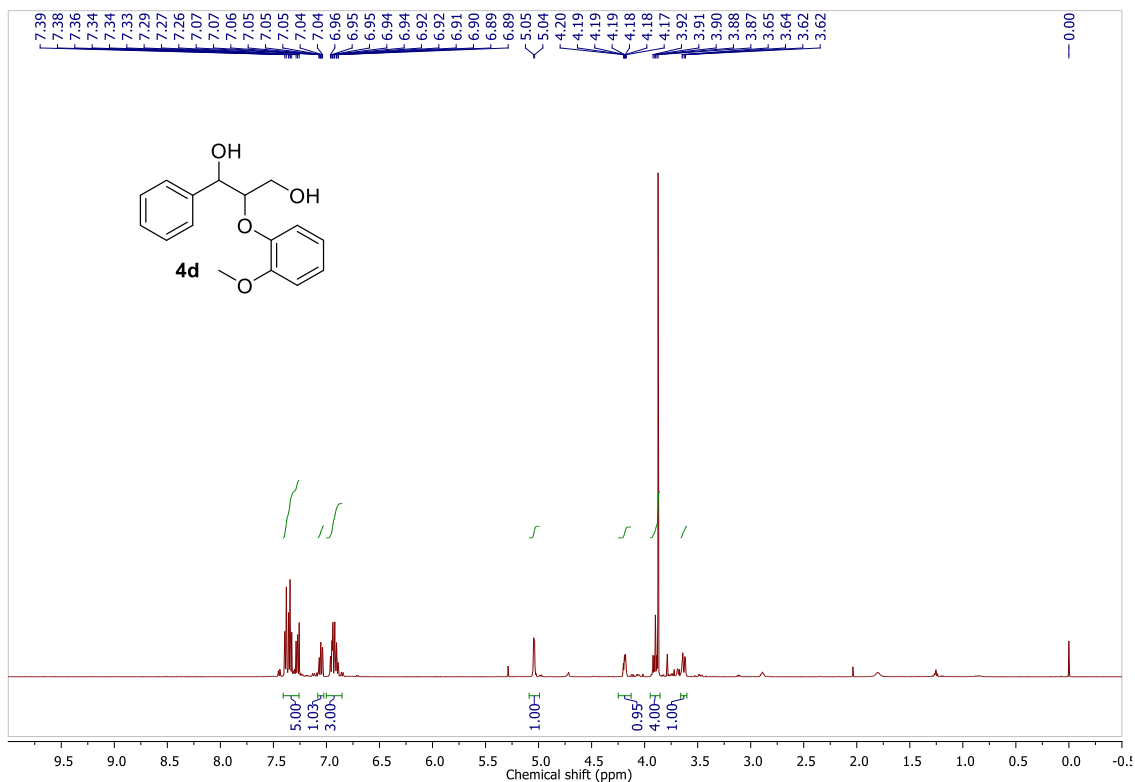

**<sup>13</sup>C NMR (126 MHz, CDCl<sub>3</sub>) 2-(2-methoxyphenoxy)-1-phenylpropane-1,3-diol **4d****

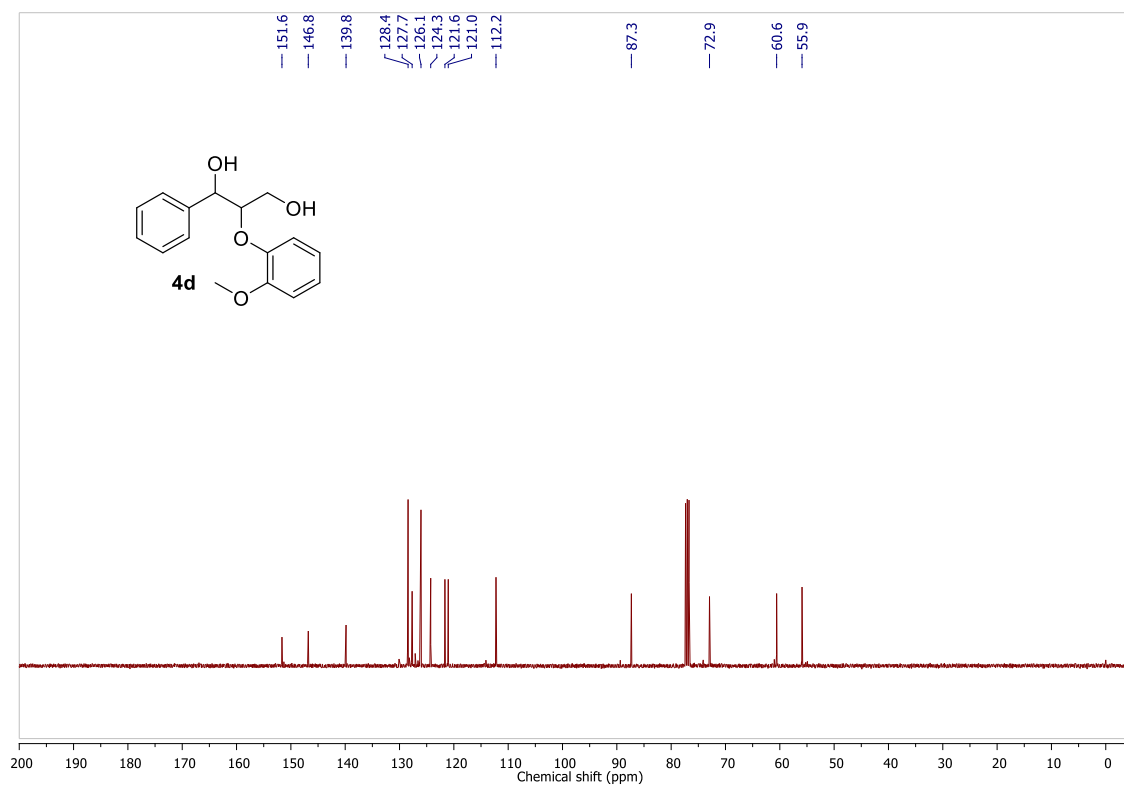

**<sup>1</sup>H NMR (500 MHz, CDCl<sub>3</sub>) 2-(2-methoxy-4-methylphenoxy)-1-phenylpropane-1,3-diol **4e****

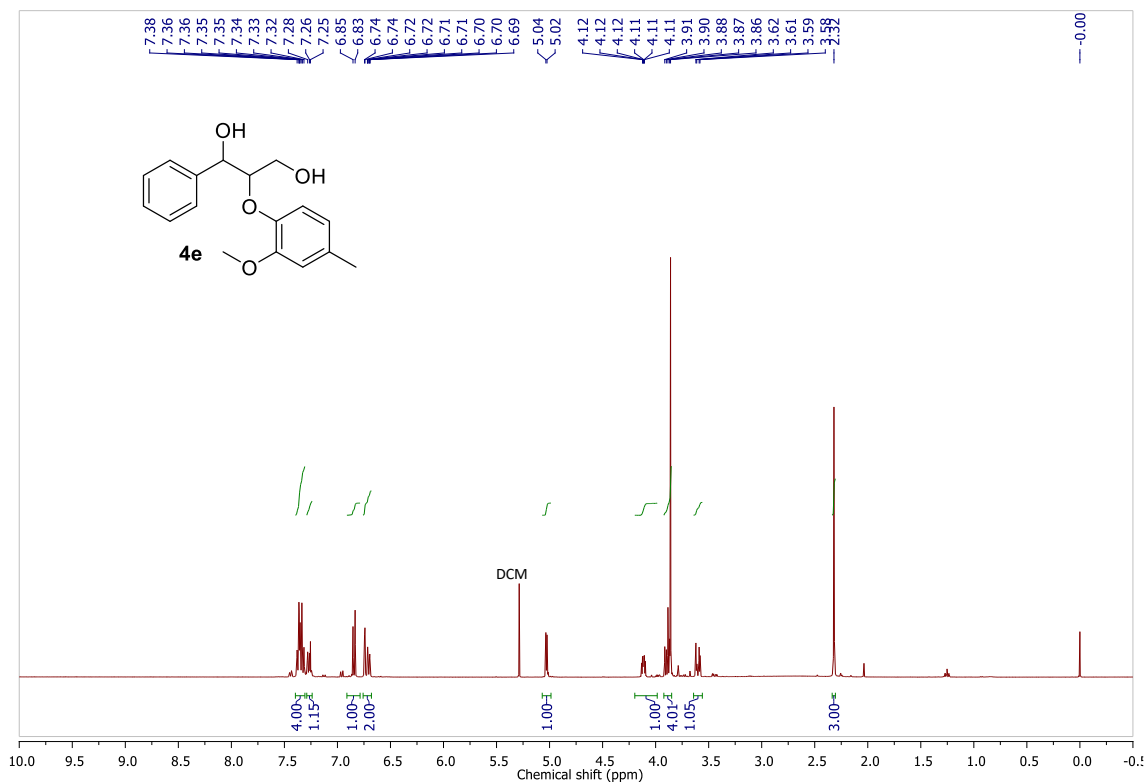

**<sup>13</sup>C NMR (126 MHz, CDCl<sub>3</sub>) 2-(2-methoxy-4-methylphenoxy)-1-phenylpropane-1,3-diol **4e****

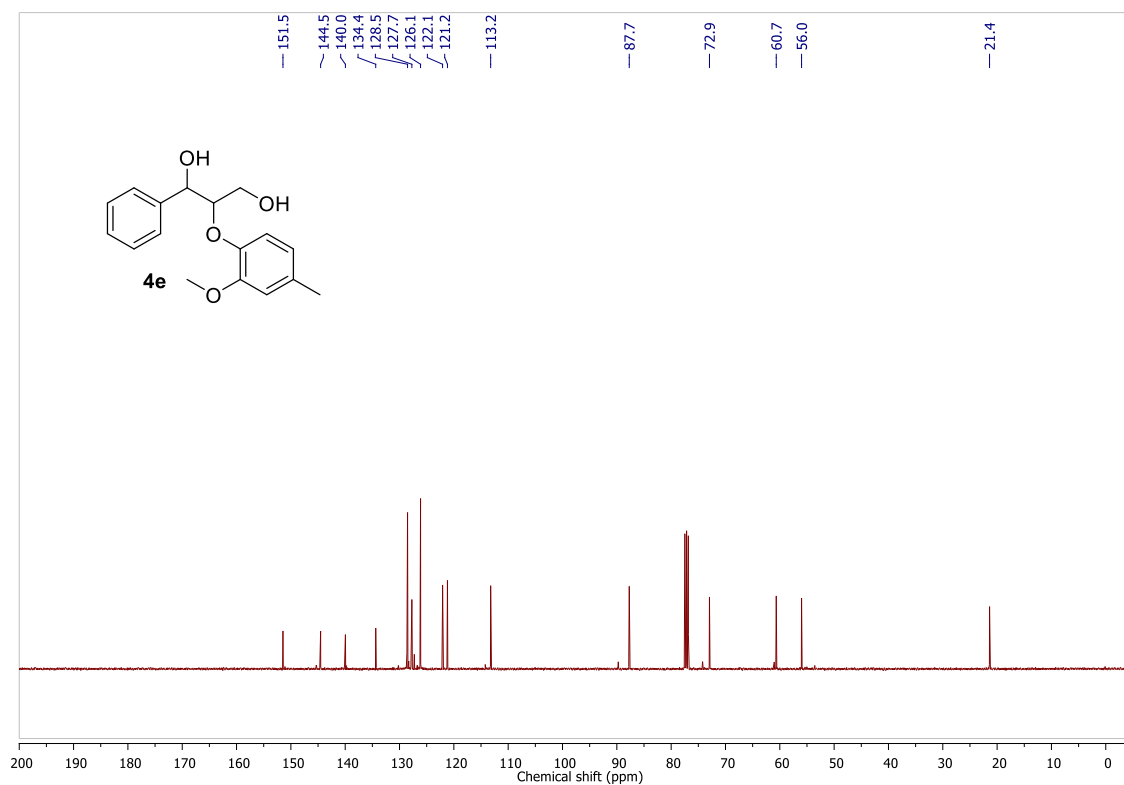



**<sup>1</sup>H NMR (500 MHz, CDCl<sub>3</sub>) 2-(2,6-dimethoxyphenoxy)-1-phenylpropane-1,3-diol **4f****

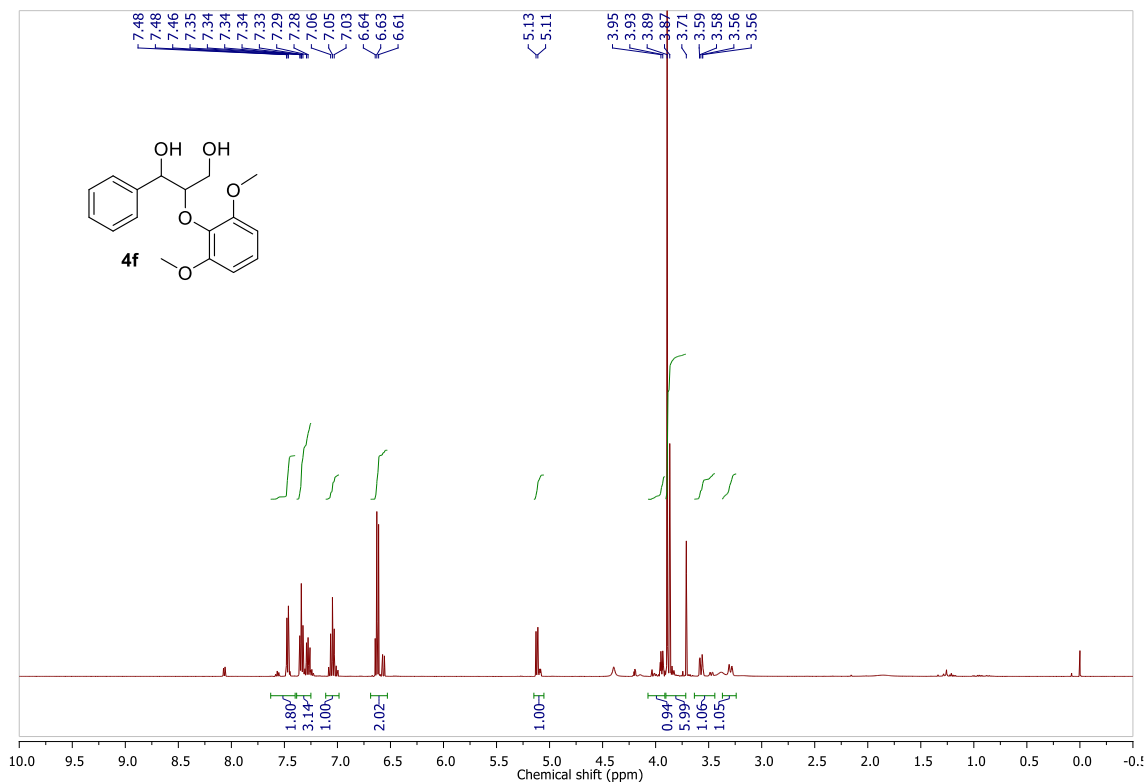

**<sup>13</sup>C NMR (126 MHz, CDCl<sub>3</sub>) 2-(2,6-dimethoxyphenoxy)-1-phenylpropane-1,3-diol **4f****

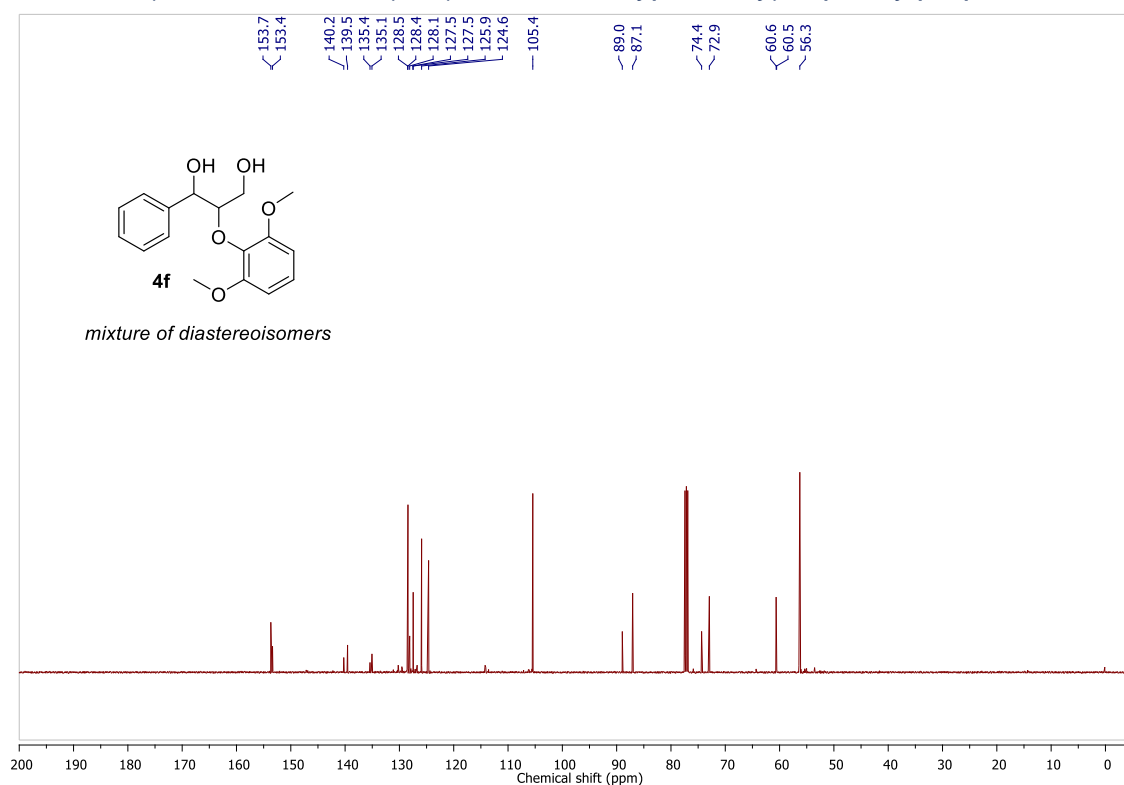

**<sup>1</sup>H NMR (500 MHz, CDCl<sub>3</sub>) 1-(4-(benzyloxy)phenyl)-2-(2-methoxyphenoxy)propane-1,3-diol**  
**4g**

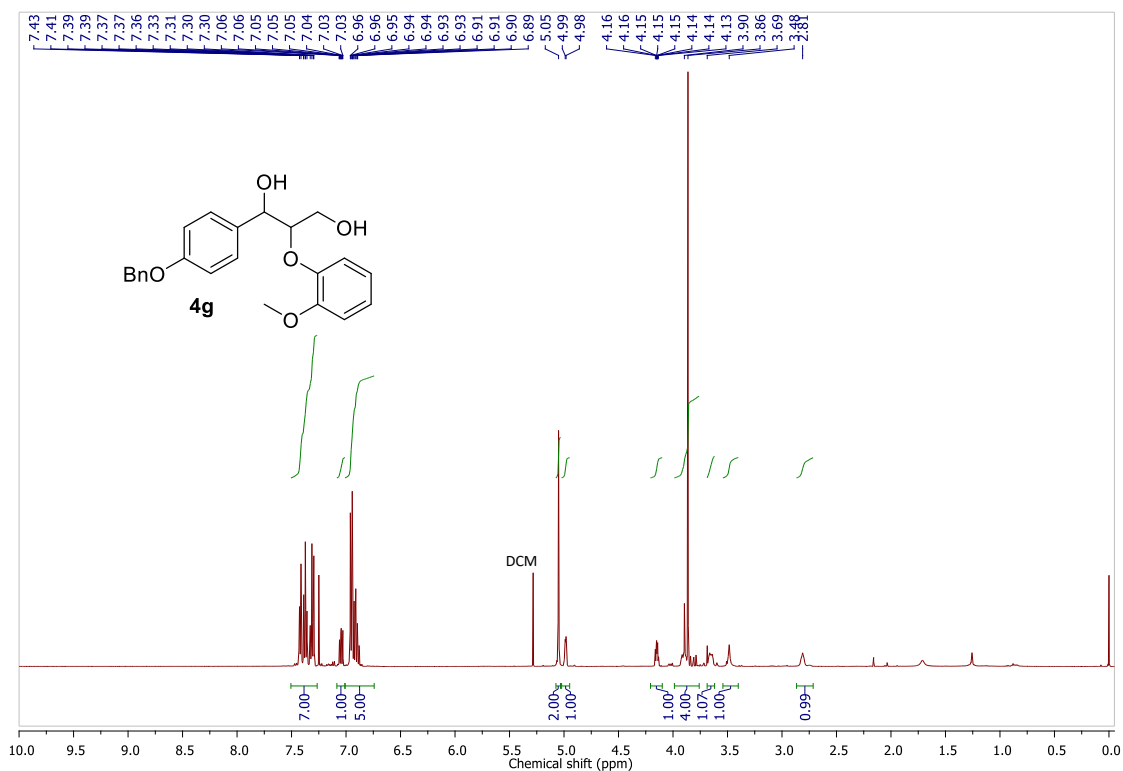

**<sup>13</sup>C NMR (126 MHz, CDCl<sub>3</sub>) 1-(4-(benzyloxy)phenyl)-2-(2-methoxyphenoxy)propane-1,3-diol**  
**4g**

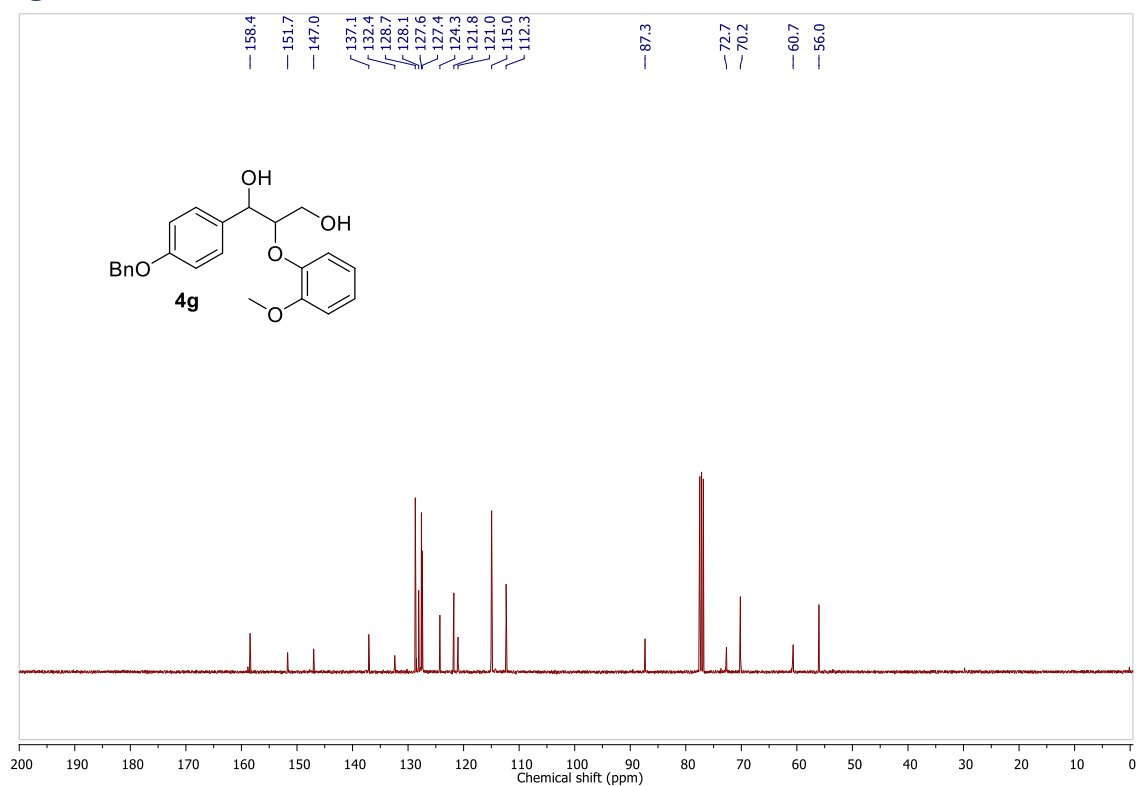

**<sup>1</sup>H NMR (500 MHz, CDCl<sub>3</sub>+ few drops of D<sub>2</sub>O) 1-(4-(benzyloxy)-3-methoxyphenyl)-2-(2-methoxyphenoxy)propane-1,3-diol **4h****

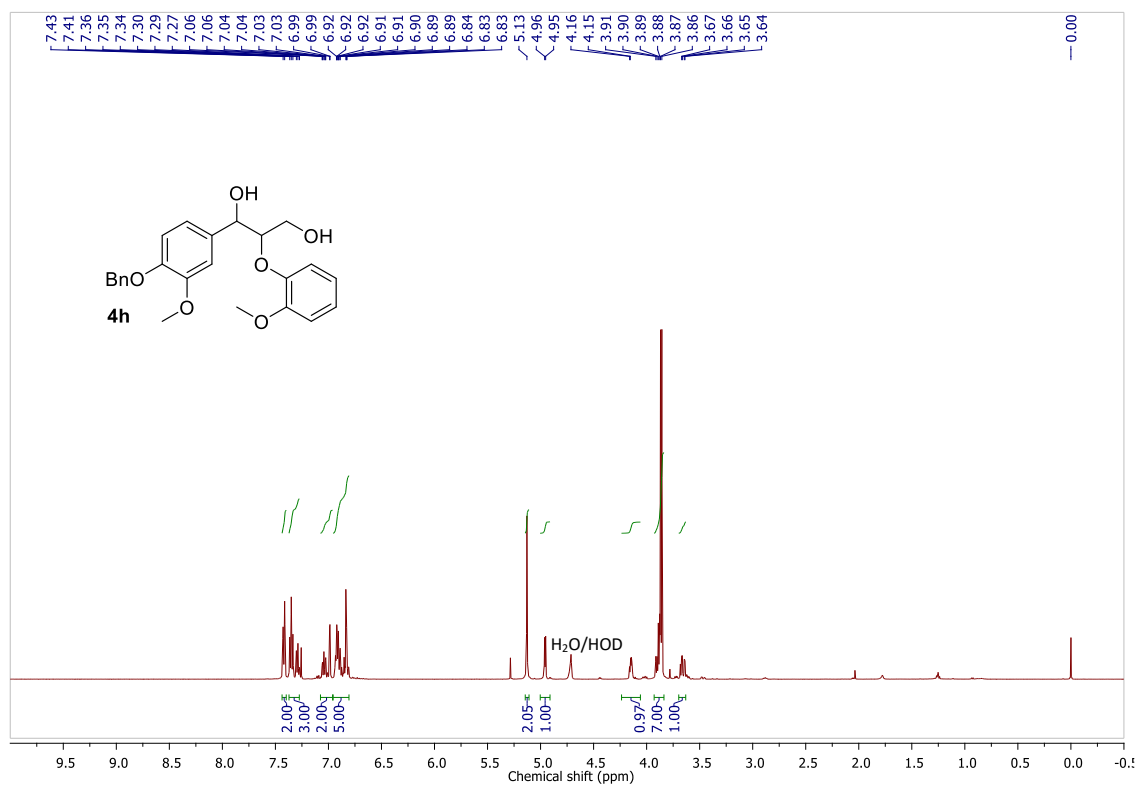

**<sup>13</sup>C NMR (126 MHz, CDCl<sub>3</sub>) 1-(4-(benzyloxy)-3-methoxyphenyl)-2-(2-methoxyphenoxy)propane-1,3-diol **4h****

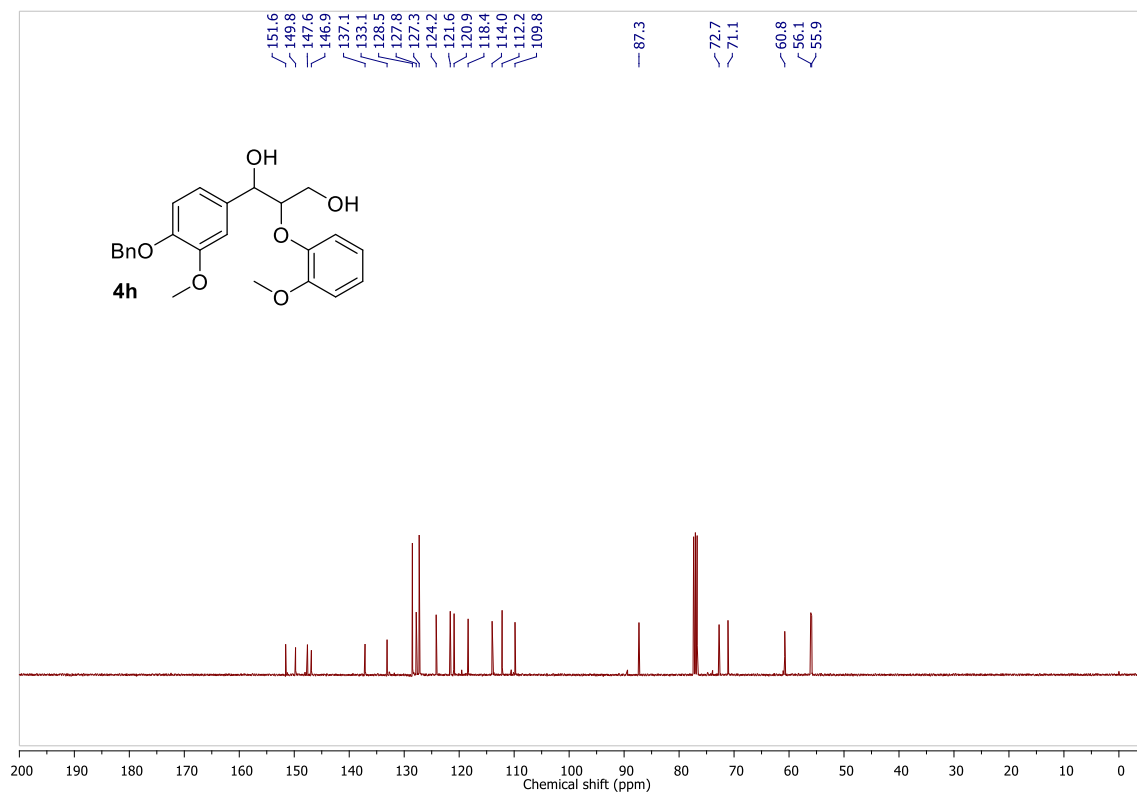

**<sup>1</sup>H NMR (500 MHz, CDCl<sub>3</sub>) 1-(4-(benzyloxy)-3,5-dimethoxyphenyl)-2-(2-methoxyphenoxy)propane-1,3-diol **4i****

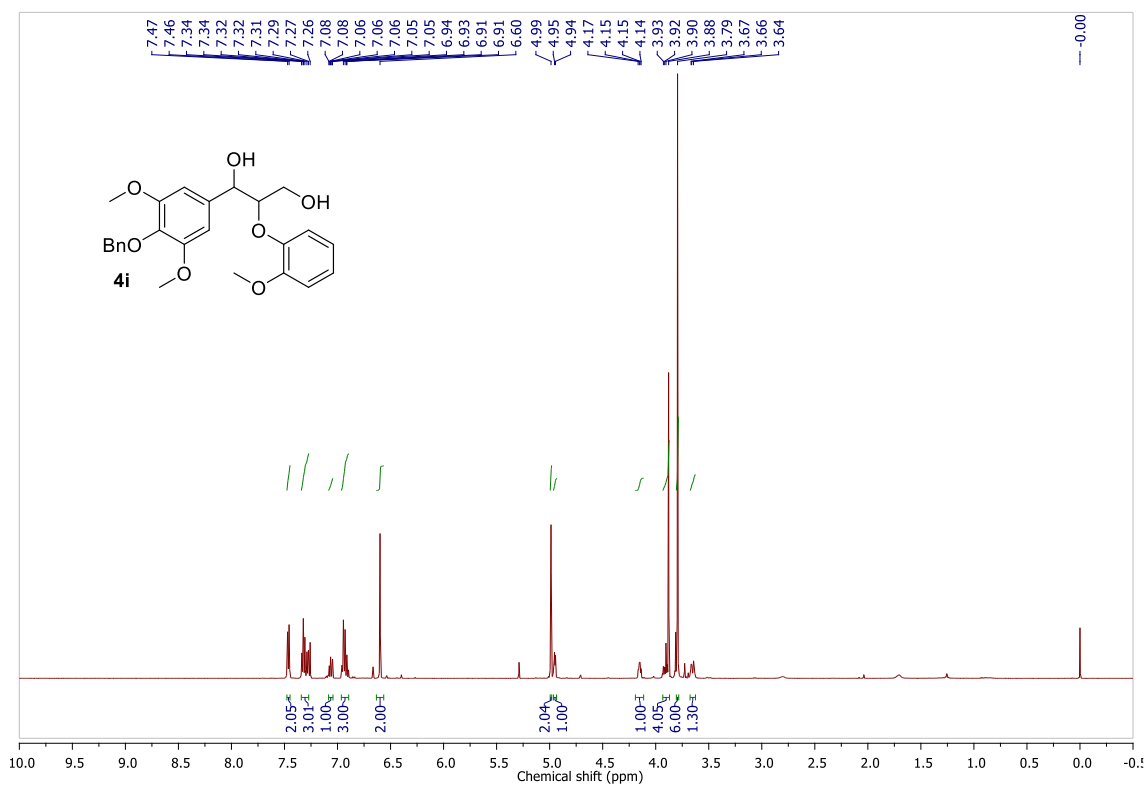

**<sup>13</sup>C NMR (126 MHz, CDCl<sub>3</sub>) 1-(4-(benzyloxy)-3,5-dimethoxyphenyl)-2-(2-methoxyphenoxy)propane-1,3-diol **4i****

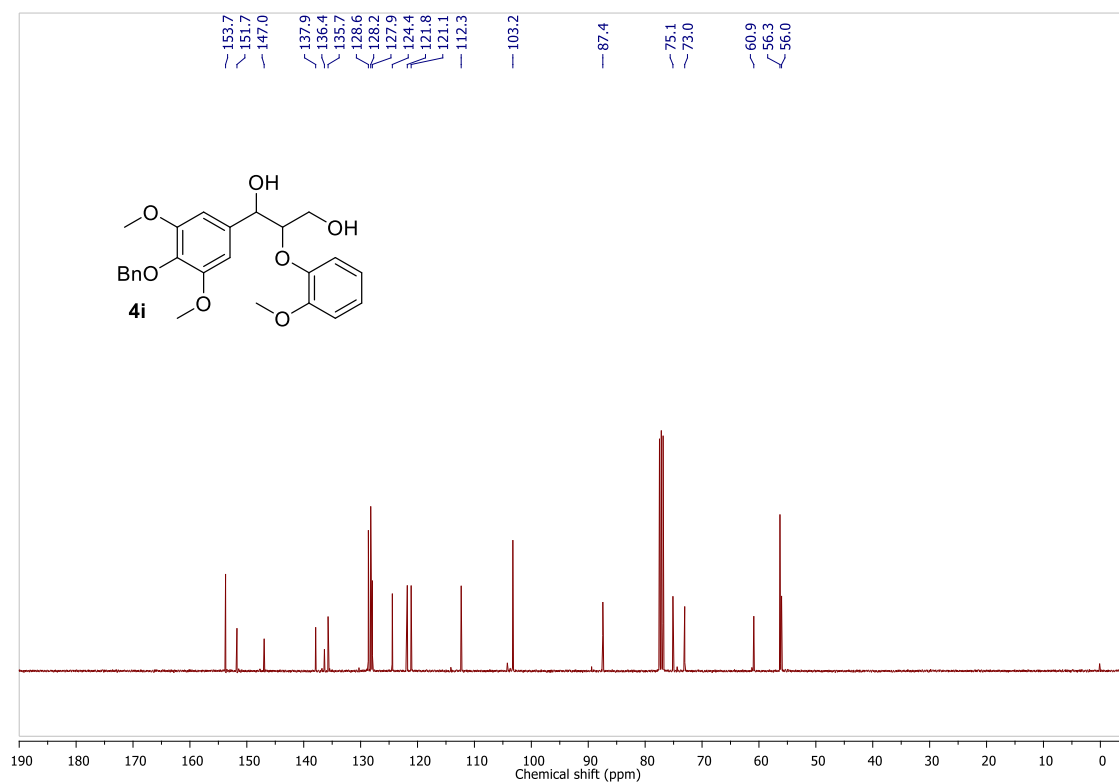

**<sup>1</sup>H NMR (500 MHz, CDCl<sub>3</sub>) 1-(4-(benzyloxy)-3,5-dimethoxyphenyl)-2-(2-methoxy-4-methylphenoxy)propane-1,3-diol **4j****

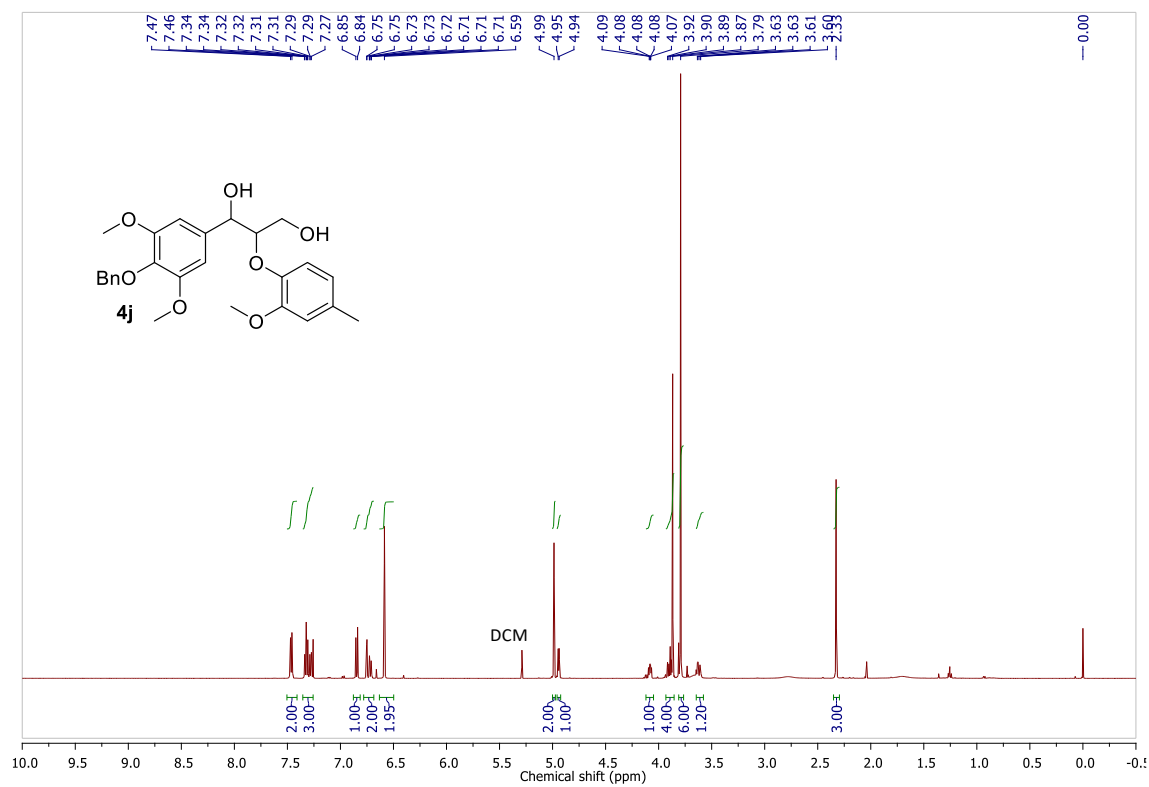

**<sup>13</sup>C NMR (126 MHz, CDCl<sub>3</sub>) 1-(4-(benzyloxy)-3,5-dimethoxyphenyl)-2-(2-methoxy-4-methylphenoxy)propane-1,3-diol **4j****

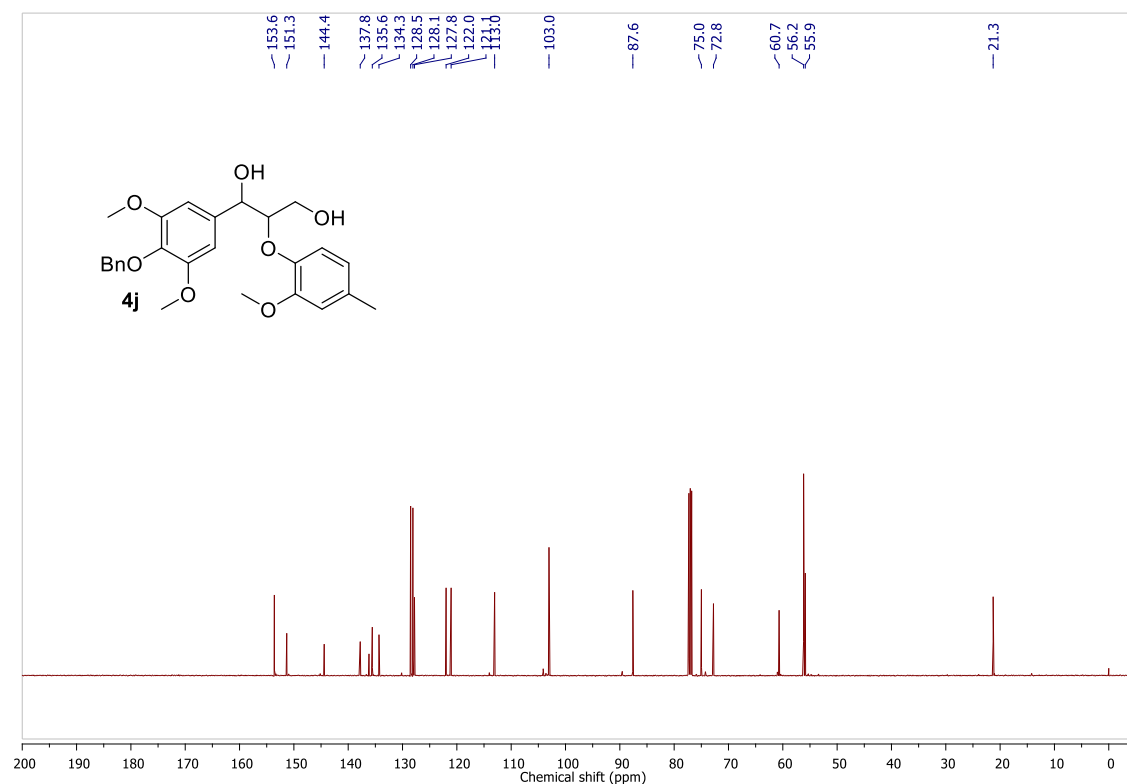

### $^1\text{H}$ NMR (500 MHz, $\text{CDCl}_3$ ) 1-(4-hydroxyphenyl)-2-(2-methoxyphenoxy)propane-1,3-diol **4I**

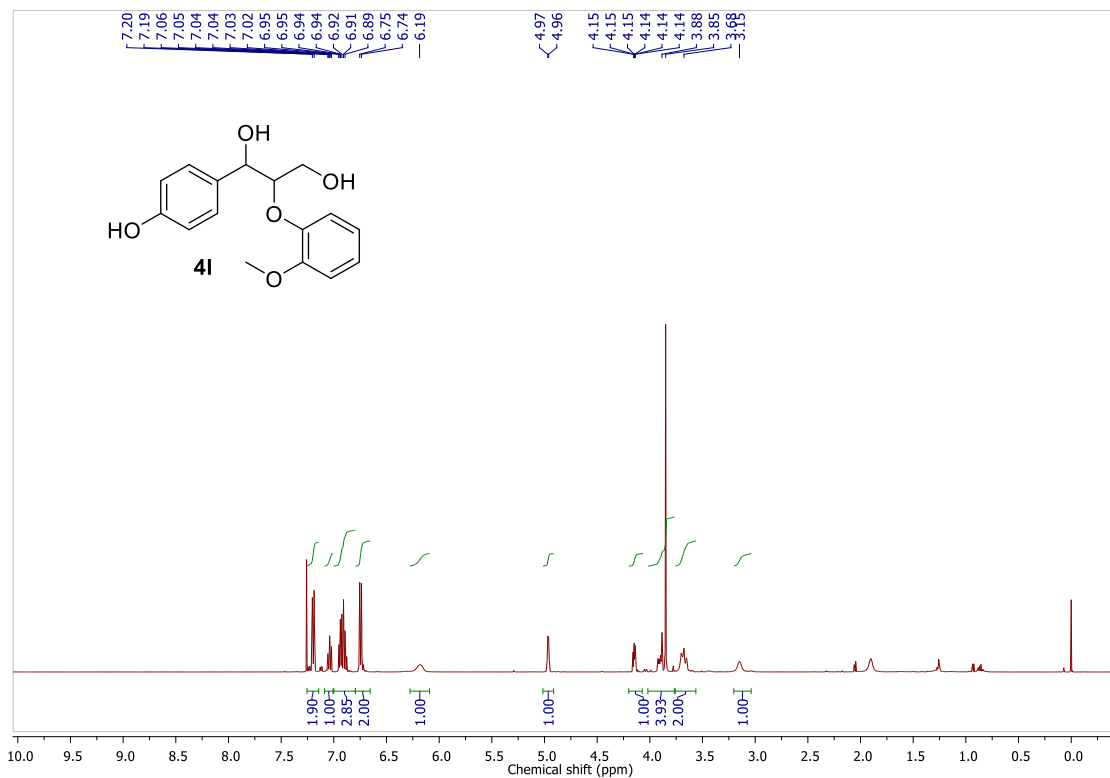

### $^{13}\text{C}$ NMR (126 MHz, $\text{CDCl}_3$ ) 1-(4-hydroxyphenyl)-2-(2-methoxyphenoxy)propane-1,3-diol **4I**

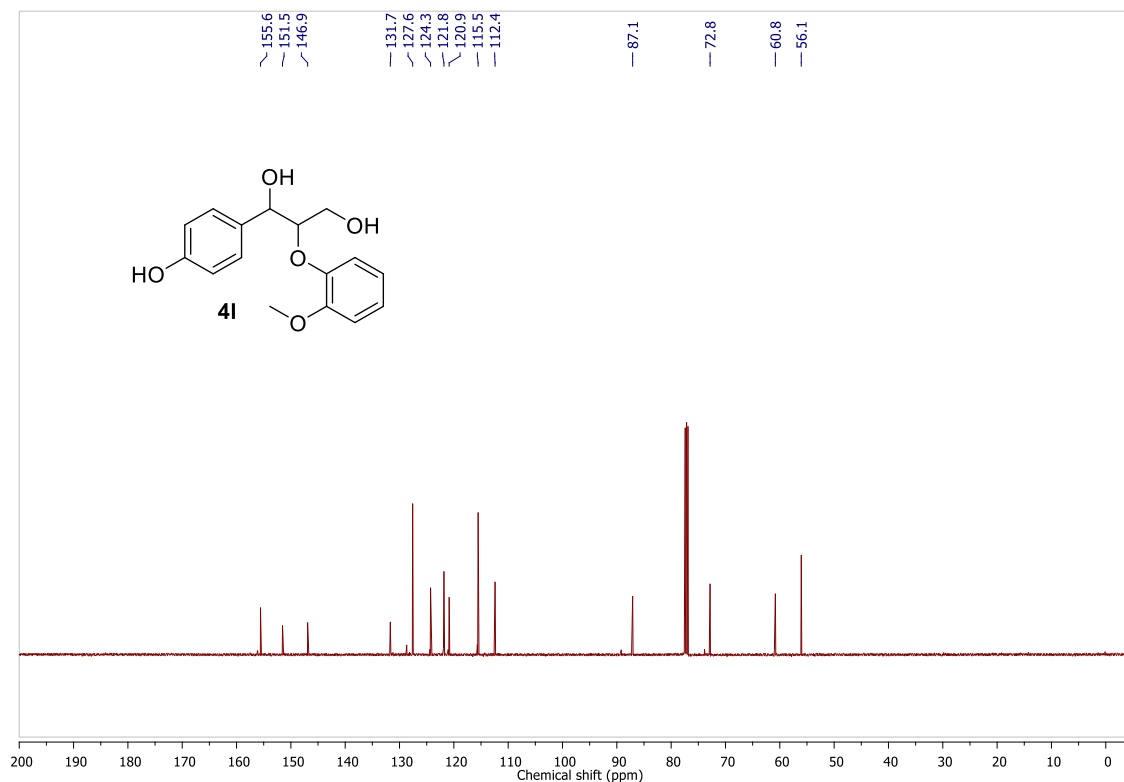

**<sup>1</sup>H NMR** (500 MHz, CDCl<sub>3</sub> + few drops of D<sub>2</sub>O) 1-(4-hydroxy-3-methoxyphenyl)-2-(2-methoxyphenoxy)propane-1,3-diol **3m**

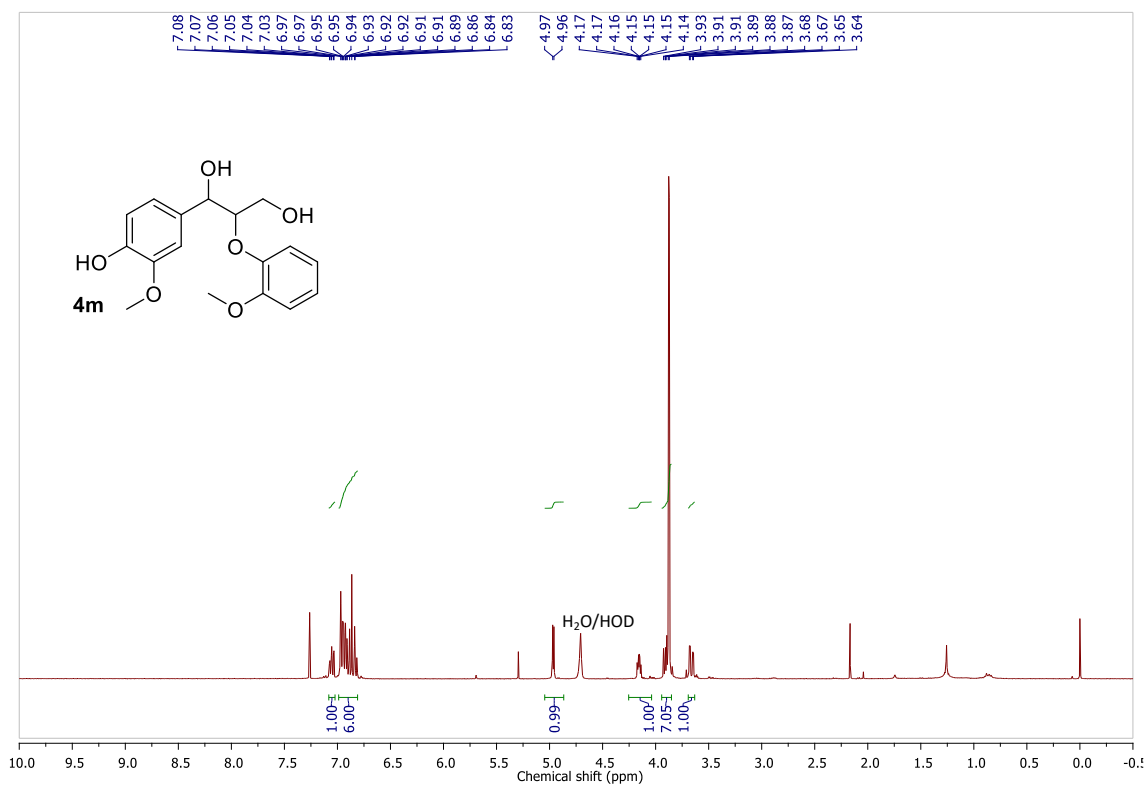

**<sup>13</sup>C NMR** (126 MHz, CDCl<sub>3</sub>) 1-(4-hydroxy-3-methoxyphenyl)-2-(2-methoxyphenoxy)propane-1,3-diol **4m**

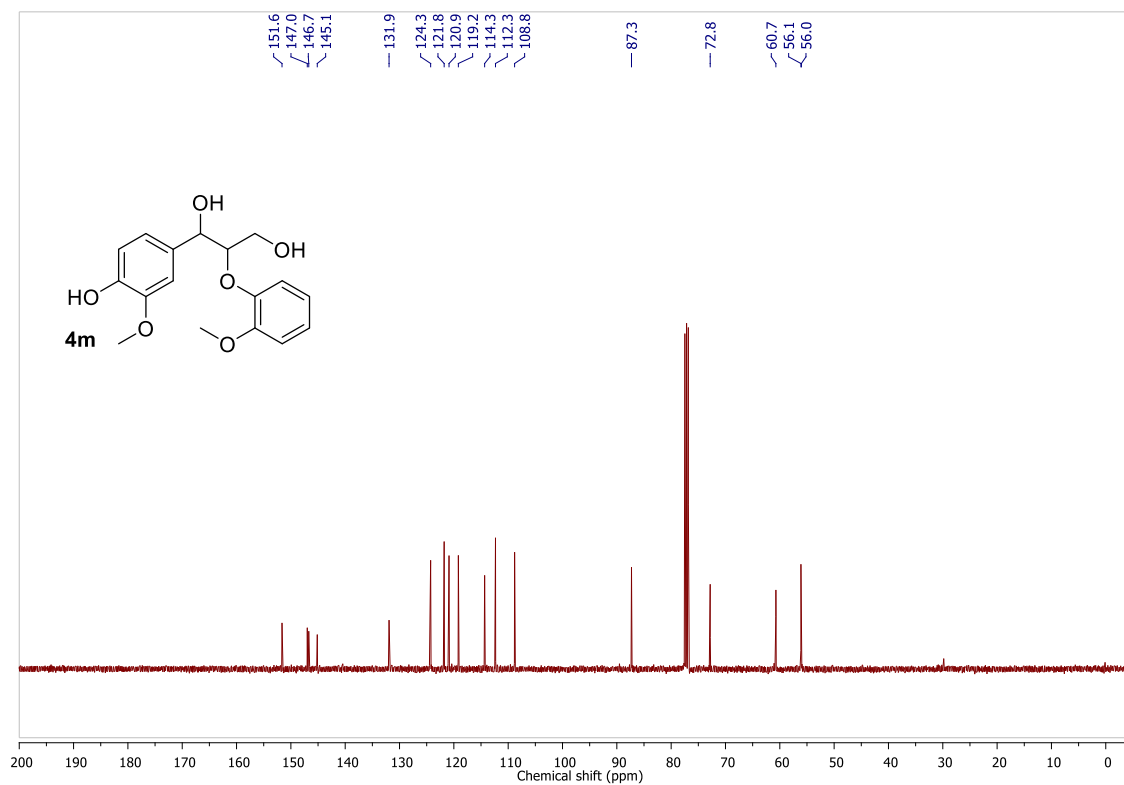

**<sup>1</sup>H NMR** (500 MHz, CDCl<sub>3</sub> + few drops of D<sub>2</sub>O) 1-(4-hydroxy-3,5-dimethoxyphenyl)-2-(2-methoxyphenoxy)propane-1,3-diol **4n**

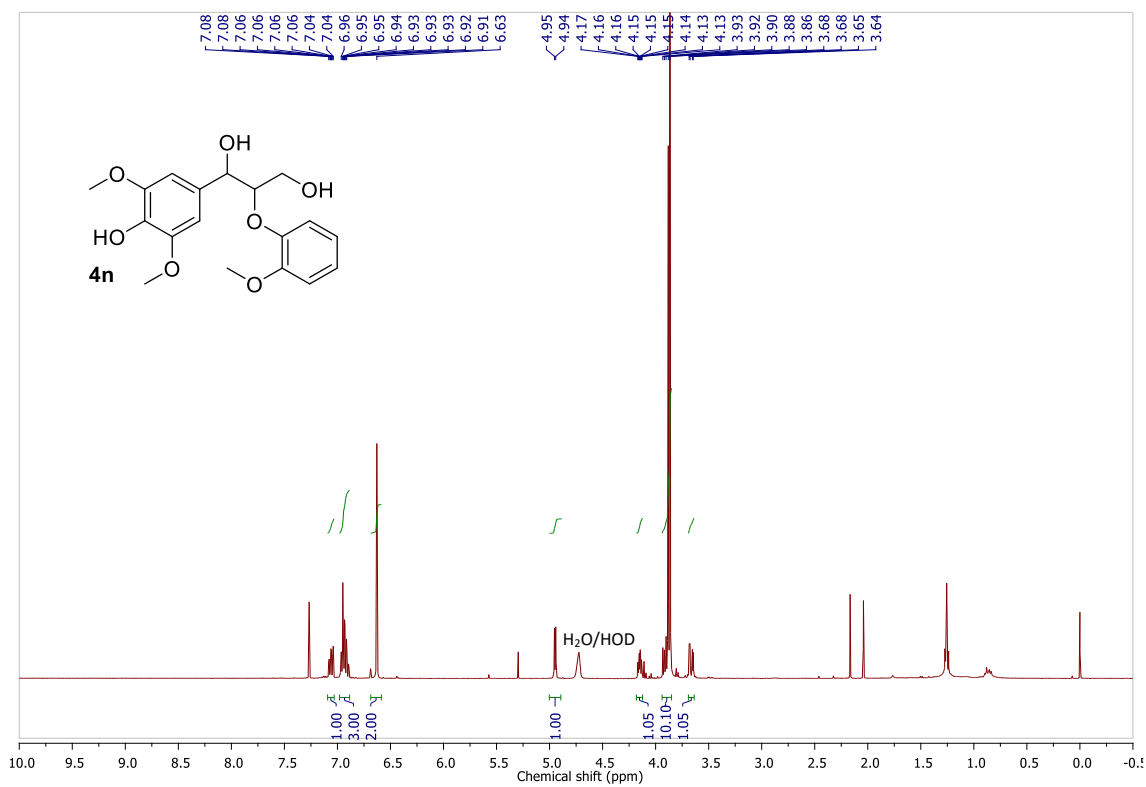

**<sup>13</sup>C NMR** (126 MHz, CDCl<sub>3</sub>) 1-(4-hydroxy-3,5-dimethoxyphenyl)-2-(2-methoxyphenoxy)propane-1,3-diol **4n**

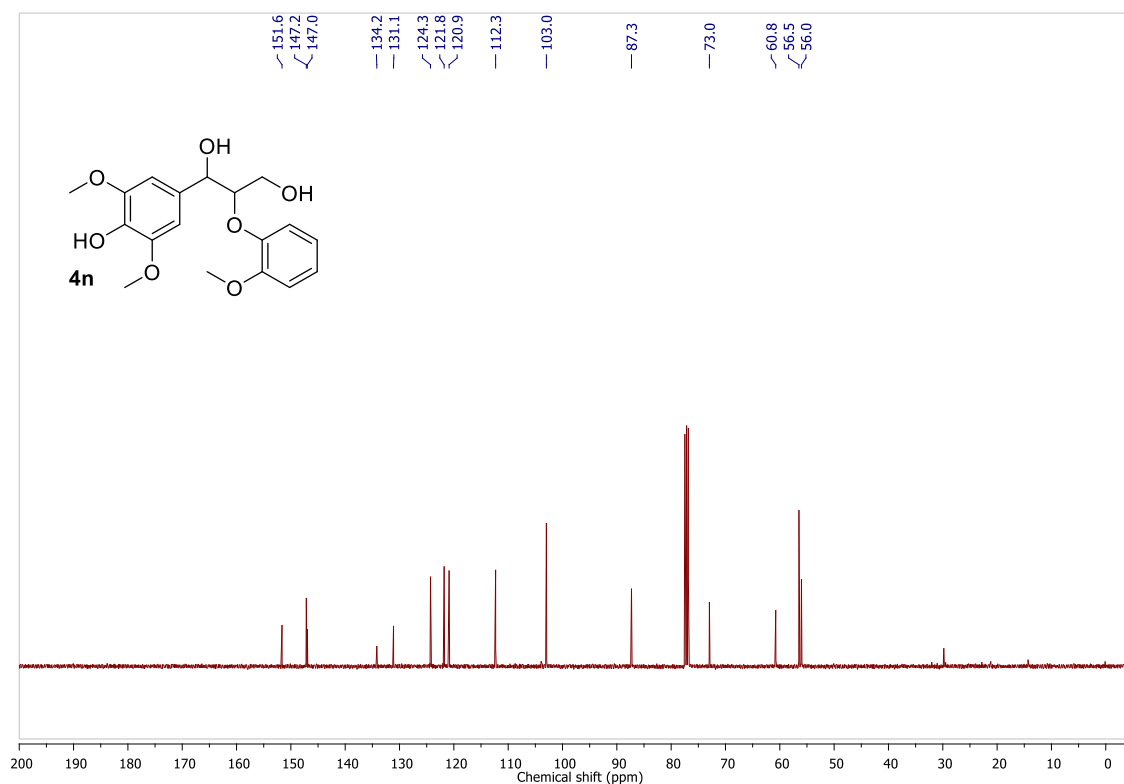



**<sup>1</sup>H NMR** (500 MHz, CDCl<sub>3</sub> + few drops of D<sub>2</sub>O) 1-(4-hydroxy-3,5-dimethoxyphenyl)-2-(2-methoxy-4-methylphenoxy)propane-1,3-diol **4o**

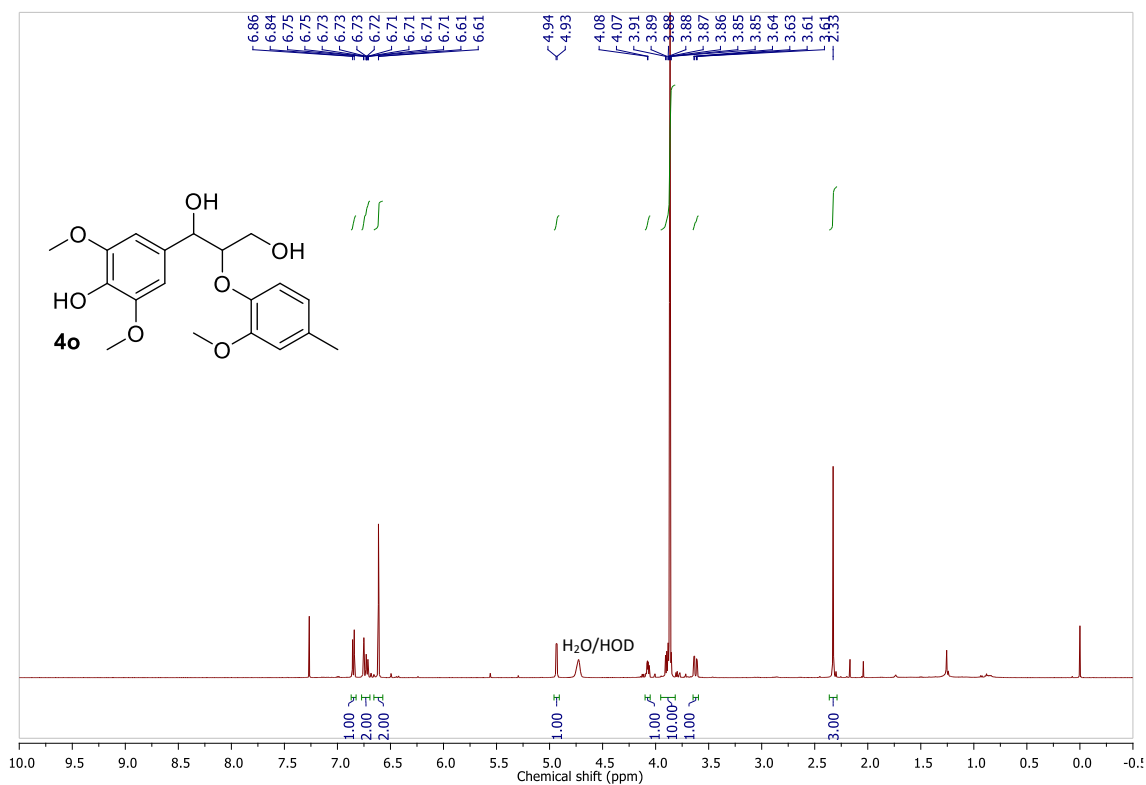

**<sup>13</sup>C NMR** (126 MHz, CDCl<sub>3</sub>) 1-(4-hydroxy-3,5-dimethoxyphenyl)-2-(2-methoxy-4-methylphenoxy)propane-1,3-diol **4o**

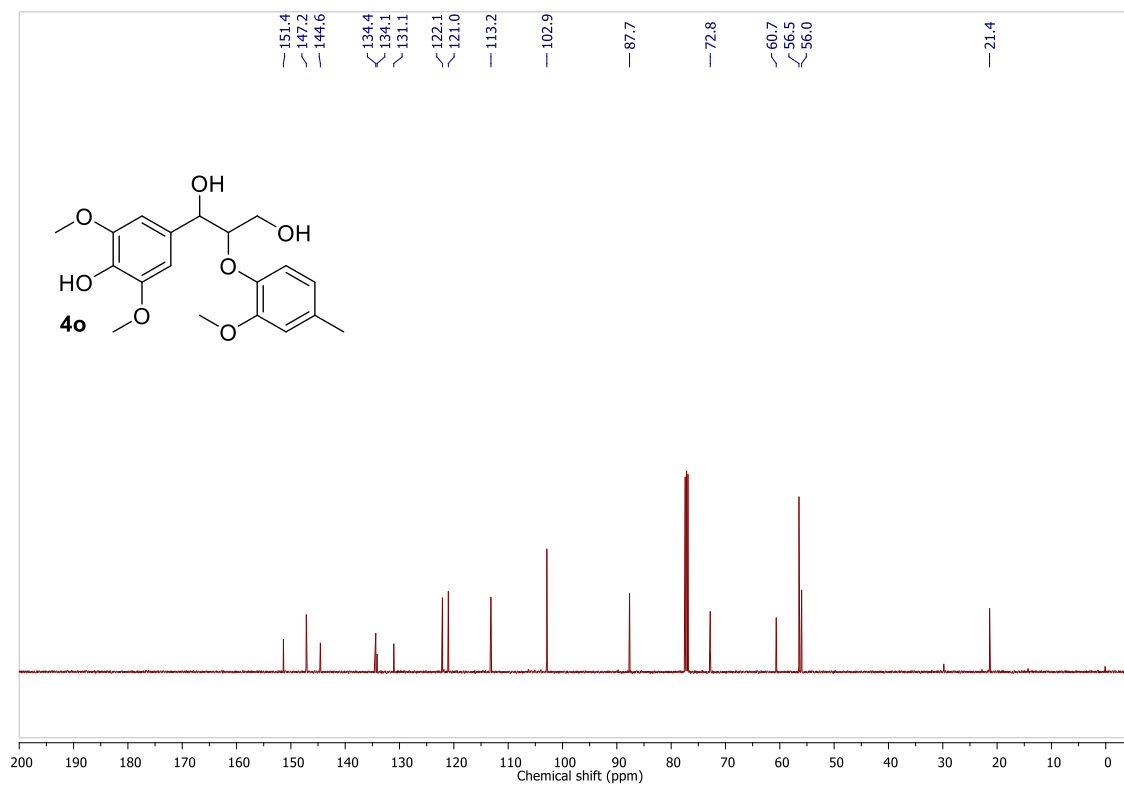

**<sup>1</sup>H NMR (500 MHz, CDCl<sub>3</sub>) methyl 2-ethoxy-3-oxo-3-phenylpropanoate**

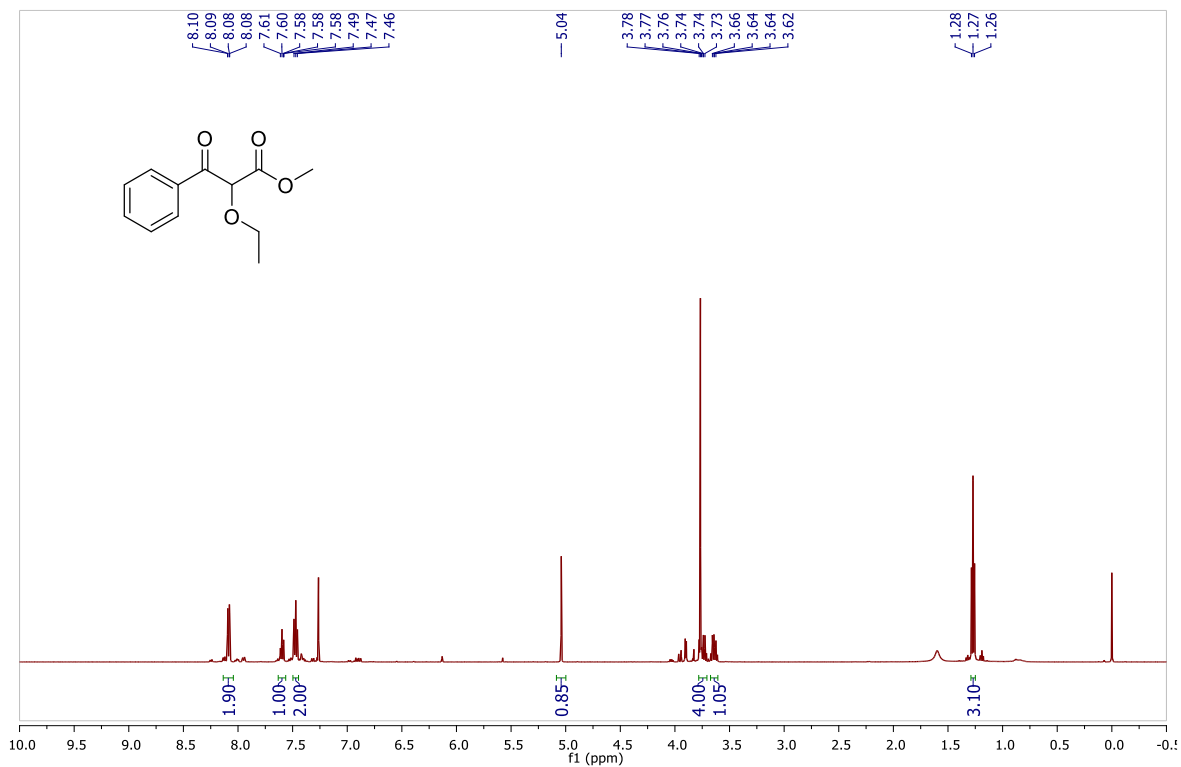

**<sup>13</sup>C NMR (126 MHz, CDCl<sub>3</sub>) methyl 2-ethoxy-3-oxo-3-phenylpropanoate**

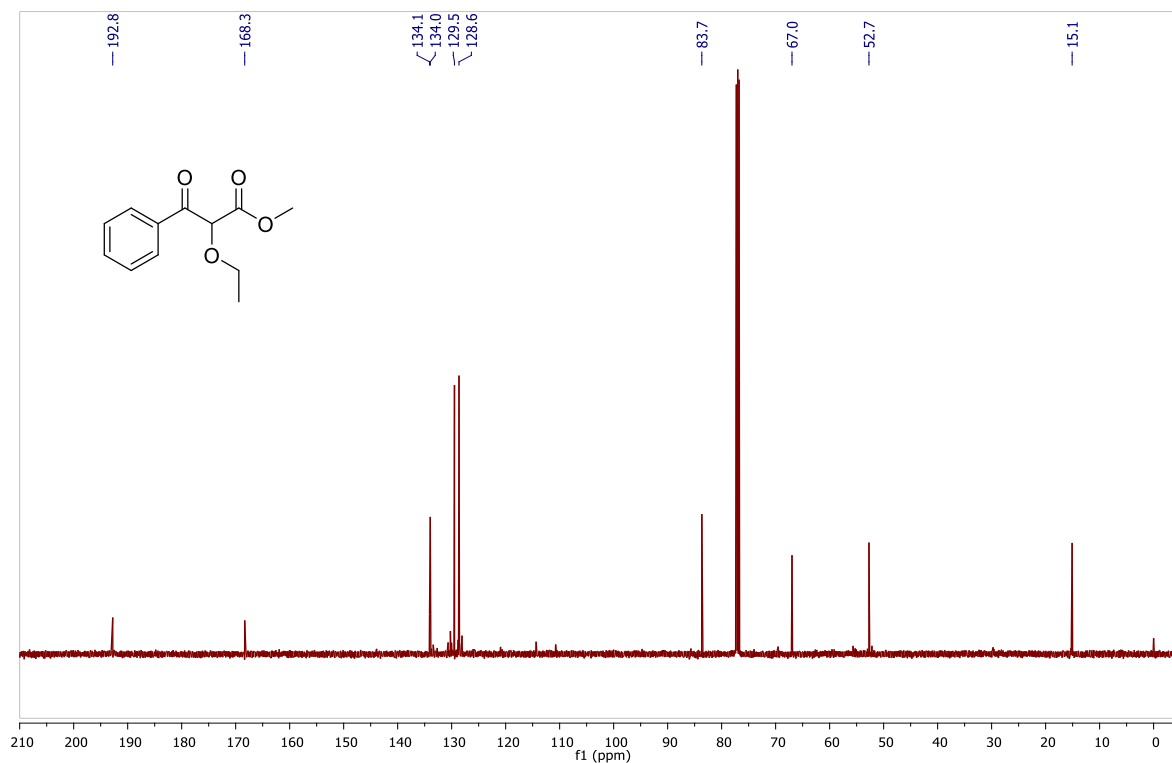

Supplement: d0ob00800a1.pdf [file d0ob00800a1.pdf]
